1 **Geometric principles underlying the proliferation of a model cell system**

2

3 Ling Juan Wu<sup>1\*</sup>, Seoungjun Lee<sup>1</sup>, Sungshic Park<sup>1,2</sup>, Lucy E. Eland<sup>1,2</sup>, Anil Wipat<sup>1,2</sup>, Seamus Holden, and  
4 Jeff Errington<sup>1\*</sup>

5 <sup>1</sup>Centre for Bacterial Cell Biology, Biosciences Institute, Medical School, Newcastle

6 University, Richardson Road, Newcastle upon Tyne NE2 4AX, UK;

7 <sup>2</sup>Interdisciplinary Computing and Complex BioSystems research group, School of Computing,

8 Newcastle University, Newcastle upon Tyne, NE4 5TG, UK

9 \*Correspondence: [l.j.wu@ncl.ac.uk](mailto:l.j.wu@ncl.ac.uk); [jeff.errington@ncl.ac.uk](mailto:jeff.errington@ncl.ac.uk)

10

11

12

13

14 Lead contact. [jeff.errington@ncl.ac.uk](mailto:jeff.errington@ncl.ac.uk)

15

16

17 **SUMMARY**

18 Wall deficient variants of many bacteria, called L-forms, divide by a simple mechanism that  
19 does not depend on the complex FtsZ-based cell division machine. We have used  
20 microfluidic systems to probe the growth, chromosome cycle and division mechanism of  
21 *Bacillus subtilis* L-forms. The results show that forcing cells into a narrow linear  
22 configuration greatly improves the efficiency of cell growth and chromosome segregation.  
23 This reinforces the view that L-form division is driven by an excess accumulation of surface  
24 area over volume. Cell geometry was also found to play a dominant role in controlling the  
25 relative positions and movement of segregating chromosomes. The presence of the  
26 nucleoid appears to influence division both via a cell volume effect and by nucleoid  
27 occlusion, even in the absence of the FtsZ machine. Overall, our results emphasise the  
28 importance of geometric effects for a range of critical cell functions and are of relevance for  
29 efforts to develop artificial or minimal cell systems.

30

31

32

33

34

35

36

37

38

39

40

41

42

43 **KEYWORDS** Bacteria, L-form, geometry, cell division, chromosome segregation,  
44 microfluidics, synthetic cell, minimal cell, *Bacillus subtilis*

45

## 46 INTRODUCTION

47 The cell wall is an ancient and highly conserved structure that is almost ubiquitous in the  
48 bacterial domain (Errington, 2013). It provides a tough, elastic, protective outer layer  
49 around the cell and is largely responsible for the characteristic shapes associated with  
50 different forms of bacteria (Egan et al., 2017; Rajagopal and Walker, 2017). The wall is the  
51 target for many effective antibiotics, and fragments of the wall are recognised by innate  
52 immune receptors (Akira et al., 2006). Its most critical general role lies in osmoregulation,  
53 enabling bacterial cells in dilute environments to withstand the turgor pressure generated  
54 by the high osmolarity of the cytoplasm (Rojas and Huang, 2017). A large number (~30) of  
55 normally essential genes are required for synthesis of the material of the wall, and its spatial  
56 regulation during cell growth and division (Errington and Wu, 2017; Zhao et al., 2017).

57 In the light of the multiplicity of important functions for the wall it is surprising that under  
58 certain conditions (isotonic to avoid osmotic lysis) many bacteria, both Gram-positive and  
59 Gram-negative, that normally have a cell wall, can thrive in a wall-less state, called the L-  
60 form (Allan et al., 2009; Errington et al., 2016). Although L-forms can probably inhabit a  
61 range of specialised niches in the environment, they have mainly been studied in the  
62 context of their possible role in various chronic diseases and recurrent infections (Domingue  
63 and Woody, 1997; Domingue, 2010; Errington et al., 2016).

64 In previous work with the Gram-positive bacterium *Bacillus subtilis* we have shown that L-  
65 form growth requires two types of mutations: one that leads to excess membrane synthesis,  
66 and one that counteracts the increased cellular levels of reactive oxygen species (ROS) that  
67 occur for reasons that are not fully understood in L-forms (Mercier et al., 2013; Kawai et al.,  
68 2015; 2019). Upregulation of membrane synthesis can be achieved directly with mutations  
69 affecting the regulation of fatty acid synthesis, or indirectly by inhibiting peptidoglycan  
70 precursor synthesis (Mercier et al., 2013). In some bacteria, inhibiting peptidoglycan  
71 precursor synthesis alone seems sufficient to enable L-form growth (Mercier et al., 2014).  
72 While walled bacteria generally divide by a well-regulated binary fission process, division of  
73 L-forms of *B. subtilis* and several other bacteria investigated, occurs through a range of  
74 poorly regulated and seemingly haphazard events including membrane blebbing, tubulation,  
75 vesiculation and fission. Crucially, these division events occur independent of the normally  
76 essential FtsZ-based division machine (Leaver et al., 2009; Mercier et al., 2013; Errington et  
77 al., 2016; Studer et al., 2016). Our current model for L-form proliferation assumes that  
78 division is driven simply by an imbalance between volume and surface area. Support for this  
79 idea comes from the fact that we have been unable to identify mutations in genes required  
80 for division, other than those that upregulate membrane synthesis (Mercier et al., 2013).  
81 Furthermore, there is a sound mathematical basis for the process (Svetina, 2009) and it has  
82 even been replicated in vitro with simple lipid vesicle systems (Peterlin et al., 2009). The  
83 simplicity of this division process has led to suggestions that L-form division may be a good  
84 model for studying how primordial cells proliferated before the invention of “modern”  
85 protein based division machines (Leaver et al., 2009; Chen, 2009; Briers et al., 2012;  
86 Errington, 2013). It is also of interest as the basis for proliferation in simplified or artificial  
87 cell systems (Blain and Szostak, 2014; Caspi and Dekker, 2014; Hutchison et al., 2016).

88 Detailed analysis of L-form proliferation has been hampered by the lack of effective systems  
89 for following their growth and division by time-lapse imaging. The cells tend not to remain in  
90 focus in liquid culture and attempts to tether them to surfaces can cause flattening and  
91 lysis. Thus, many questions about their cell cycle remain unresolved, particularly the extent  
92 to which chromosome replication and segregation can be controlled and coordinated with  
93 growth and division in cells with pleomorphic shape and no cell wall. (Note that in this paper  
94 because many of the cells observed are not undergoing division, we use the term  
95 segregation for sister chromosomes that have visibly separated, whether or not a division  
96 septum separates them.)

97 Here we report that the use of microfluidic devices that force L-forms into an elongated  
98 shape, with cross section similar to that of walled cells, dramatically improves the rate of  
99 growth and the efficiency and fidelity of chromosome segregation and other cell cycle  
100 processes. The cross section also influences the rate of division in channels. Despite the lack  
101 of requirement for FtsZ, division is strongly biased to internucleoid spaces, as in walled cells.  
102 Our results also support the notion of a key role for changes in surface area to volume  
103 underlying L-form division. Overall, these results show that simple geometric effects can  
104 have a profound impact on the efficiency of fundamental cell cycle processes including  
105 growth, chromosome replication and cell division. They also lend support to the idea that  
106 simple biophysical effects such as phase separation and entropic de-mixing (e.g. Jun and  
107 Wright, 2010; Wu et al, 2019b) underlie key steps in the cell cycle of modern bacteria. The  
108 results and methods developed here provide important insights into fundamental principles  
109 of cell growth, proliferation and chromosome inheritance and have important implications  
110 for the development of simplified or artificial cell systems.

111

## 112 **RESULTS**

### 113 **Irregular division and chromosome segregation in unconstrained L-form cells**

114 Previous work on *B. subtilis* “primary” L-forms (i.e. L-forms derived directly from walled  
115 cells, requiring only one or two mutations), as well as many earlier papers with long-  
116 propagated “stable” L-forms, have highlighted the inefficient and rather haphazard mode of  
117 proliferation in liquid culture (Kandler and Kandler, 1954; Leaver et al., 2009; Studer et al.,  
118 2016; Mercier et al., 2013). Fine details of the multiplication process have been difficult to  
119 obtain because various methods normally used to fix the position of cells during time-lapse  
120 imaging either damage or distort the shape of L-forms, or fail to keep progeny cells in focus.  
121 Figure 1A and Movie 1 show typical examples of L-form cells (strain 4740) growing  
122 unconstrained in liquid medium in a glass-bottomed microscope dish. Cells clearly  
123 underwent growth and division but segments of cell mass frequently moved in and out of  
124 focus (top and bottom panels of Figure 1A), making long-term tracking of cells difficult. Note  
125 that in this kind of common event, the main cell body appeared to be attached to the glass  
126 surface by a fine tube of membrane material which filled up with cytoplasm and DNA as the  
127 cell grew. The presence of these fine tubes of membrane has been described in previous L-

128 form publications (e.g. Leaver et al., 2009; Studer et al., 2016), although their nature and  
129 biological significance is unclear.

130 A key objective of the current work was to characterise the extent to which chromosome  
131 replication and segregation remain coordinated with division, so in these and subsequent  
132 experiments, chromosomes were labelled with fluorescent fusions to the HU protein, which  
133 binds DNA almost non-specifically (Kohler and Marahiel, 1997).

134 The middle and lower panels of Figure 1A (and Movie 1) showed: (i) that discrete nucleoid-  
135 like structures could be discerned within L-forms (yellow arrows) but brighter structures,  
136 containing either overlapping multiple nucleoids or un-resolved multiple chromosomes,  
137 could be seen frequently (e.g. 0 min); (ii) that these could resolve into multiple discrete  
138 structures (e.g. arrows at 50 min); and (iii) that the arrangement in larger L-form clusters  
139 was complex and difficult to track because of focus and overlapping problems (e.g. 150  
140 min). It also appeared that some cell lobes might be devoid of DNA (e.g. phase dark objects  
141 with no associated fluorescence at 100 min (red arrows). (Note that in this and some  
142 subsequent figures the fluorescence image brightness was enhanced to enable visualization  
143 of small amounts of DNA. Raw images are available on request.)

#### 144 **Use of microfluidics to constrain L-form movement during growth**

145 Agarose based microfluidic devices offered a possible way to constrain the cells without  
146 damaging them, while maintaining them within a focal plane. We fabricated microfluidic  
147 devices based on those described by Moffitt et al. (2012; see Eland et al., 2016; Figure S1).  
148 Each device contained sub-micron-scale linear tracks (channels), imprinted into agarose. The  
149 channels were restricted in height ( $\sim 1.6 \mu\text{m}$ ) to impose a strong z-axis control over the cells  
150 as they grew. The growth channels were open, at either one or both ends, to gutters  
151 through which growth medium flowed, delivering fresh nutrients.

152 It turned out that the gutters provided an improved way to image L-form growth without  
153 physical constraint. Figure 1B & Movie 2 show an example of a common division event  
154 within a gutter. Here, a large L-form cell underwent 'blebbing' to generate multiple small  
155 daughter units, all in fairly good focus. Three of the blebs displayed HU fluorescence in  
156 frames from 40 to 70 min, whereas one (circled in yellow in the bottom panels) was non-  
157 fluorescent and presumably anucleate. The variation in the sites of division and in the  
158 number of nucleoids in daughter cells in these and many other similar experiments showed  
159 that chromosome segregation in unconstrained L-forms is poorly regulated and relatively  
160 disorganized.

#### 161 **Imposition of an elongated architecture regularizes L-form growth**

162 Surprisingly, when L-forms were trapped in the channelled area of the microfluidic chamber,  
163 so that growth would be forced to occur along a fixed longitudinal axis, a strikingly different  
164 pattern of growth was observed. Now, the cells grew rapidly and with uniform appearance  
165 along the channel (red arrows in Figure 1C). In the experiment shown, L-forms were mixed  
166 with mCherry labelled walled cells (yellow arrows) to enable comparison of their behaviour.  
167 The L-forms were almost indistinguishable from the walled cells except that the latter had

168 regular constrictions (due to cell division; indicated by green bars) and a slightly less regular  
169 cylindrical shape, perhaps because of frictional drag against the channel walls. However,  
170 upon exiting the channels, the difference between walled cells, which continued to grow in  
171 straight lines out into the gutter, and the L-forms, which immediately formed chains and  
172 clusters of spherical blebs, was striking.

173 Interestingly, when growing in these channels, the L-forms rarely divided (see the section  
174 below). In the typical example shown despite having similar length increase after 15 min of  
175 growth in the channels, clear constrictions corresponding to division sites (marked with  
176 short green bars) increased from 5 to at least 9 in the chain of walled cells, but none were  
177 evident in the L-forms (Figure 1C 15 min).

178 The microfluidic channel designs in these initial experiments were of two types, featuring  
179 repeating patterns of widths approximately 800, 900 and 1000 nm wide, or 600, 700 and  
180 800 nm wide. Walled cells of wild type *B. subtilis* are approximately 850 nm in diameter  
181 (Sharpe and Errington, 1998), so the channels roughly mimic walled cell dimensions. Under  
182 these conditions the growth rate of the L-forms could be readily estimated from the  
183 increase in length over time, assuming that the cross-sectional area of the channel and thus  
184 of the cell was constant. As summarised in Figure 1D, in 800 nm channels the average length  
185 doubling time of the L-form strain (strain 4739) grown at 32°C was about 2x of that of the  
186 isogenic walled cells (strain SL004) (55 min  $\pm$  10.1 vs 28 min  $\pm$  3.3, respectively).

187 As expected, growth in the wider channels did not alter the width of walled cells (which  
188 normally maintain a constant width irrespective of growth rate; Sharpe et al., 1998), nor did  
189 it affect their length doubling time (Figure 1D). The L-forms, however, showed increased  
190 length doubling time as the channel width increased (5% for 900 nm and 15% for 1000 nm,  
191 respectively).

## 192 **Effects of channel width on L-form growth and division**

193 The low frequency of division of L-forms trapped in the narrow channels (Figure 1C, 2A and  
194 Figure S2) was unexpected. We previously reported experiments suggesting that L-form  
195 division is driven by excess membrane synthesis, creating a high surface area to volume  
196 (A/V) ratio that is incompatible with a spherical shape and thus drives shape changes  
197 leading to division (Mercier et al., 2013). Cylindrical shapes have a higher A/V ratio than  
198 spheres of the same volume. It was therefore possible that the narrow channels imposed a  
199 geometry with high enough A/V to eliminate the driving force for division that occurs in  
200 unconstrained (roughly spherical) L-forms. If so, increasing the channel width, and therefore  
201 reducing the imposed A/V, might re-enable division. To test this we designed two  
202 microfluidic chips with wider channels (Chip No. 6 = 1, 1.2 and 1.4  $\mu$ m; Chip No. 7 = 1.8, 2.0  
203 and 2.2  $\mu$ m). As predicted, 'in-channel' division occurred much more frequently in these  
204 wider channels (e.g., 35, 65, 90 and 105 min frames in Figure 2B). It needs to be mentioned  
205 that the wide channels were only half the length of those of the narrow channels, and so  
206 would effectively give only half the chance of observing 'in-channel' division in the same  
207 time frame, making direct comparisons difficult. Figure S3A and Movie 3 show a typical  
208 example of a long L-form growth sequence in wide channels. Accurate quantitation of  
209 division frequency was problematical for several reasons. First, tracking of cells was limited

210 by the channel length, because undivided cells often “bubbled” out of the ends of the  
211 channel and this material then disappeared (Figure 1C, 45 & 50 min frames; and 105 min  
212 frame onwards in Figure 2A), so measurement of total cell length per division was not  
213 possible. Second, after division in the wider channels some progeny cells spontaneously  
214 escaped from the channels (e.g. cells labelled with a red star in Figure 2B frames 65 min and  
215 85 min, and the 195 min frame in Figure S3A; Movie 3) so that, again, their subsequent fate  
216 could not be recorded. Finally, an element of stochasticity seemed to arise due to small  
217 irregularities in the channels, probably either casting irregularities or debris / thin  
218 membrane fibres from the growing L-form cells. Nevertheless, we estimated the difference  
219 in division frequency by counting ‘in-channel’ division events in continuous cell lineages over  
220 5 hour time courses for channels of different widths. Clustered division events that occurred  
221 occasionally in cells with chromosome segregation defects (see below) were excluded from  
222 this analysis. The results confirmed that division was rare in narrow ( $< 1 \mu\text{m}$ ) channels (7  
223 division events in 37 cells during the whole time course) and much more frequent in the  
224 wider ( $1\text{-}2.2 \mu\text{m}$ ) channels (72 division events in 38 cell lineages) (Figure 2C). The lower  
225 frequency of division in the narrow channels compared with the wide channels is consistent  
226 with the A/V model for division in L-forms (see Discussion).

### 227 **Efficient chromosome segregation in channel constrained L-forms**

228 We then examined the effects of channel confinement on nucleoid arrangement and  
229 segregation, using HU-GFP fluorescence imaging. When the cells were initially placed in  
230 narrow channels, the multiple nucleoids often appeared as large overlapping or un-resolved  
231 masses (Figure 3A, red arrows at 0 min; cells in  $0.8$  and  $0.9 \mu\text{m}$  wide channels) but as the  
232 cells increased in length, these masses gradually resolved into smaller, individual nucleoids  
233 (e.g. 80 min).

234 After this initial phase of resolution many cells showed a remarkably regular pattern of  
235 chromosome replication and segregation. For example, in Figure 3A (full sequence in Figure  
236 S2), over a time frame of 110 min, the short cell on the left, containing one nucleoid at 0  
237 min, undertook three sequential successful duplications (times 15, 65 & 110 min), to give 2,  
238 4 and then 8 segregated nucleoids, while the large cell on the right also showed increasingly  
239 regular nucleoid arrangement (times 80 and 95 min) (enlarged section shown in Figure 3C).  
240 Movie 4 shows another example of large DNA masses resolving into smaller and often  
241 regularly spaced nucleoids. Several L-form strains with different genetic origins were tested  
242 (including strains 4739, 4741 and 4744; Table S1) and all were able to resolve large  
243 nucleoids and then regularly distribute the chromosomes when grown in narrow channels.  
244 Quantitative analysis of various nucleoid parameters (area, width, eccentricity and  
245 internucleoid separation; Figure 3F-I & Figure S3D & E), showed that, except for eccentricity  
246 (see below), L-form nucleoids in  $0.8$  or  $0.9 \mu\text{m}$  channels appeared remarkably similar to  
247 those of walled cells.

248 These results demonstrate that cell wall synthesis is not required for regular chromosome  
249 segregation, at least not when cells are forced to grow under these geometric constraints.  
250 Importantly, these findings also definitively exclude any models for chromosome replication  
251 or segregation that require pre-existing markers in the cell wall.

## 252 **Effects of cell geometry on chromosome segregation**

253 We then examined the effects of channel width on chromosome replication and  
254 segregation. Unlike the narrow channels, chromosome arrangement was increasingly  
255 perturbed in the wider L-form cells. Stills of typical frames are shown in Figure 3B, with  
256 more examples shown in Figure S3A, B and movies 3 & 5. A close up of the typical nucleoid  
257 appearance in a wide channel is shown in Figure 3D. Although nucleoid lobes similar in size  
258 and fluorescence intensity to the individual nucleoids of cells in the narrow channels were  
259 evident, they tended to form clumps that split up only infrequently. Inspection of the  
260 movies revealed highly dynamic patterns of splitting and coalescence that will merit further  
261 investigation. Quantitative measurements of various nucleoid parameters relative to  
262 channel width are shown in Figure 3 F-I, and Figure S3D & E. Nucleoid area and nucleoid  
263 separation (centroid to centroid) both increased in parallel with increasing channel width,  
264 due to the failure of nucleoids to separate efficiently in wider channels. The failure of  
265 nucleoid lobes to separate was also manifested in a decrease in nucleoid eccentricity (ratio  
266 of nucleoid width to length; Figure S3D) and an increase in nucleoid width, which increased  
267 proportional to channel width (Figure S3E).

268 In support of the close connection between cell width and nucleoid configuration, we  
269 noticed that when cells grown in wider channels occasionally became slightly constricted,  
270 length wise, perhaps because of damage or miscasting of the agarose, nucleoid separation  
271 was strikingly improved (red brackets in Figure S3B; Movie 5). To test this further we  
272 designed a microfluidic chip with narrow channels interrupted by wider diamond shapes  
273 (Figure 3E, S1 & S3C; Movie 6). Nucleoids were well distributed in the narrow (700 nm) part  
274 of the channels (red brackets in Figure 3E & S3C; Movie 6). However, on growing into the  
275 larger diamond regions, nucleoids lost their regular linear arrangement and spread out in  
276 different orientations to fill the space (compare the orientations of the two nucleoids  
277 labelled by yellow arrows in Figure S3C, 30 min).

278 All of these observations and measurements are consistent with the idea that efficient  
279 chromosome segregation is dependent on the geometry of the cell and, as is evident from  
280 the line plots in Figure 3 G,I, that artificially setting the width of the L-form at about that of  
281 walled cells (~850 nm) generates a normal pattern of segregation.

## 282 **Division of L-forms mainly occurs between nucleoids**

283 Walled bacterial cells segregate sister chromosomes at cell division with high fidelity. The  
284 coordination between segregation and division is thought to rely heavily on an effect called  
285 nucleoid occlusion. As first described it was proposed to rely on a phase separation between  
286 DNA and cytoplasm, together with a tendency of membrane invagination to be impaired in  
287 the nucleoid zone (Valkenburg and Woldringh, 1984; Mulder and Woldringh, 1989;  
288 Woldringh et al., 1990). More recently nucleoid occlusion proteins, Noc in *B. subtilis* (Wu  
289 and Errington, 2004) and SlmA in *E. coli* (Bernhardt and de Boer, 2005), were identified that  
290 are associated with the chromosome and act to inhibit assembly or constriction of the FtsZ  
291 machine in its vicinity. Nevertheless, mutants deficient in these proteins still tend to divide  
292 between nucleoids under normal conditions (Wu and Errington, 2004; Rodrigues and Harry,



293 2012). Given that L-form division occurs independently of FtsZ it was interesting to examine  
294 whether L-form division is also subject to a nucleoid occlusion effect. Division through the  
295 nucleoid is barely detectable in walled cells (Kaimer et al., 2009). Perhaps surprisingly,  
296 bisection of nucleoids was also infrequent in L-forms growing in channels. Of 45 division  
297 events (excluding the “abnormal” division events that generated anucleate daughter cells –  
298 see below) only 4 (9 %) appeared to have occurred through a chromosome (e.g. arrowheads  
299 in Figure 4 and Figure S4; Movies 7 & 8). Thus, although the frequency of bisection was  
300 much higher than in walled cells using the FtsZ-based division machine, a large majority of  
301 division events (91%) still occurred between nucleoids (e.g. arrows in Figure 5A, 105 min).

### 302 **Division frequency of L-forms is increased by DNA deficiency**

303 We previously postulated that the blebbing or extrusion division events of L-forms could be  
304 driven by active nucleoid segregation followed by membrane sealing around the nucleoid  
305 (Leaver et al., 2009). This class of model gains support from in vitro experiments showing  
306 that encapsulated nanoparticles or macromolecules can drive tubular extrusions or budding  
307 transformations in simple lipid vesicles (Yu & Granick, 2009; Terasawa et al., 2012).  
308 However, in the channel experiments evidence against this idea arose in rare microfluidic  
309 “accidents” of which an example is shown in Figure 5A (full sequence in movie 9). Material  
310 spilling over from the filled channel to the right sequentially entered the adjacent channels  
311 leftwards. This material appeared to be deficient in DNA presumably because the  
312 chromosome entering the channel was incomplete, damaged or delayed. The precise nature  
313 of the defect was unclear but it resulted in a striking series of repeated divisions adjacent to  
314 the edge of the visible DNA, giving a string of small spherical compartments (red brackets).  
315 Figure 5B shows another example in which multiple small anucleate spheres were  
316 generated (“pearling”; see Discussion) at the end of a cell and in an unusually large  
317 internucleoid region (red brackets in enlarged inset). Similar events occurred in wide  
318 channels: the cell in the typical example shown in Figure 5C (and movie 10) appeared to be  
319 defective in chromosome replication (no significant change in DNA fluorescence between  
320 zero and 175 minutes). Multiple irregular sized anucleate blebs were shed from the cell  
321 along the channel.

322 The above effects appeared to occur generally in cells that were deficient in DNA. To test  
323 this idea we set up experiments in which L-forms grown in narrow channels were treated  
324 with specific inhibitors of DNA synthesis 6(p-hydroxyphenylazo)-uracil (HPUra) (Brown,  
325 1971) or N3-hydroxybutyl 6-(3-ethyl-4-methylanilino) uracil (HB-EMAU) (Tarantino et al.,  
326 1999). The two inhibitors gave similar results, generating elongated cells with few nucleoids,  
327 as expected. Importantly, division events were now frequently detected (Figure 5D, E and  
328 Movie 11, 12), even in the narrow channels that do not normally support efficient division.  
329 Again this always occurred away from regions occupied by a nucleoid. Many cells exhibited  
330 pearling (e.g. panel D and Movie 11) but other events were also frequently seen, such as  
331 division of the anucleate cells / membrane tubes (Figure 5E, red arrows; Movie 12).

332 These results appear to exclude the idea that the nucleoid can act positively to promote  
333 division and indeed suggest rather that the nucleoid has a negative effect on the division of  
334 tubular L-forms.

### 335 **Active positioning of nucleoids?**

336 Wu et al. (2019b) showed that single nucleoids in non-dividing *E. coli* cells are robustly  
337 positioned at mid-cell, whereas in cells with two nucleoids, they self-organize at 1/4 and 3/4  
338 positions, regardless of the length of the cell. In our experiments with inhibitors of DNA  
339 replication, we noticed that some cells with single nucleoids, mainly centrally located (see  
340 earlier time frames in Figure 6B and S5C), when divided to generate one DNA-free daughter  
341 and one containing the nucleoid, the single nucleoid, which was now asymmetrically located  
342 in the cell, moved towards the distal pole to restore its central position (Figure 6 and S5).  
343 The movement occurred rapidly, visible within 1 time frame (3 min) after division was  
344 observed.

## 345 **DISCUSSION**

### 346 **Importance of being rod shaped**

347 There is a long literature on L-forms (reviewed by Allan et al., 2009; Errington et al., 2016),  
348 including a range of papers describing their irregular almost haphazard mode of  
349 proliferation (e.g. Kandler and Kandler, 1954; Gumpert and Taubeneck, 1983; Leaver et al.,  
350 2009; Studer et al., 2016). Parents and daughter L-form cells vary greatly in terms of their  
351 size, in contrast to the relatively tight ~2-fold variation in the size of most walled bacteria.  
352 Division is also quite difficult to define because cells can form blebs or tubes that can retract  
353 and re-fuse with the parent cell (Leaver et al., 2009; Studer et al., 2016). However, by  
354 forcing L-forms into an elongated configuration similar to that of walled cells, growth and  
355 chromosome segregation were all greatly improved. This suggests that geometry plays an  
356 important role in cell fitness. Interestingly, Hussain et al (2018) has also observed improved  
357 growth for mutant walled *B. subtilis* cells when transitioned from spherical to rod shape,  
358 achieved by adjusting the expression level of *tagO* (involved in wall teichoic acid synthesis)  
359 and  $Mg^{2+}$  concentration, and proposed that lower doubling time of rods is likely due to cell  
360 shape and not another effect. Our result with L-forms clearly excluded the involvement of  
361 the cell wall. It thus seems that cell function is tightly connected to geometry because  
362 parameters such as surface area to volume ratio, cytoplasm to nucleoid, DNA to protein,  
363 membrane to cytoplasm, etc, are all directly affected by cell geometry.

364 Why should an axial organization, as imposed by the channel or a cylindrical wall be a  
365 preferred state? The subject has been reviewed in detail by Young (2006). Obvious  
366 possibilities include the following. First, a higher A/V ratio (i.e., a rod shape) can improve  
367 nutrient uptake by providing more surface area through which diffusion can occur, and / or  
368 more receptors for uptake of specific nutrients. Second, elongation with constant perimeter  
369 (i.e. in a cylinder) provides a way to balance the rates of synthesis of cytoplasm and surface:  
370 each increment in length ( $l$ ) results in a requirement for  $2\pi.r.l$  in surface area and  $\pi.r^2.l$  in  
371 volume. If the radius ( $r$ ) is constant, as would normally be the case, cell surface area is  
372 directly proportional to volume, irrespective of length. Third, the geometry provides cells  
373 with an axis of polarity along which the segregation of chromosomes can occur.

### 374 **Mechanism of L-form proliferation**

375 L-form proliferation has recently been identified as an interesting paradigm for how  
376 primitive cells could have proliferated before the invention of the cell wall, and as an  
377 interesting starting point for the development of artificial or minimal cell systems (Leaver et  
378 al., 2009; Briers et al., 2012; Errington, 2013; Blain and Szostak, 2014; Caspi and Dekker,  
379 2014; Hutchison et al., 2016). Genetic experiments showed that various mutations enabling  
380 the proliferation of *B. subtilis* L-forms all had in common an upregulation of cell membrane  
381 synthesis (Mercier et al., 2013), leading to the suggestion that excess surface area synthesis  
382 could drive proliferation. Theoretical considerations backed up by simple in vitro systems  
383 have demonstrated how an increase in surface area at constant volume can drive simple  
384 membrane vesicles to divide (e.g. Kas & Sackman, 1991; Peterlin et al., 2009). In rod shaped  
385 bacteria, cell surface area (A) increases almost proportionately to cell volume (V). However,  
386 in spherical cells the A/V ratio decreases during growth. It is not clear what happens to  
387 surface area regulation when normally rod-shaped bacteria transition to a non-rod shape,  
388 e.g. when the *mreB* system is impaired or the cell wall is lost. Bendezu & de Boer (2008)  
389 showed that *E. coli* cells transiting to a spherical (but walled) mutant state accumulate  
390 intracellular vesicles that presumably accommodate excess surface material, indicating that  
391 *E. coli* tends not to downregulate surface synthesis under these circumstances. However, *B.*  
392 *subtilis* seems to be able to regulate membrane synthesis, as spherical (*rod*) mutants do not  
393 seem to generate intracellular vesicles and, as mentioned above, *B. subtilis* L-forms require  
394 upregulation of membrane synthesis to proliferate (Mercier et al., 2013).

395 Although it will clearly be interesting to follow up with a more detailed quantitative analysis  
396 it is apparent that the narrow channels, which impose a higher A/V ratio on the L-forms,  
397 almost eliminate division, whereas the wider channels allow division to occur frequently.  
398 These observations are consistent with our previous model for L-form proliferation (Mercier  
399 et al., 2013) in which division is driven by the rate of surface growth exceeding that of  
400 volume increase. Shape changes and ultimately the formation of several smaller progeny  
401 from one large L-form dissipate the excess surface area generated during growth.

#### 402 **Effects of cell geometry on chromosome positioning and segregation**

403 Chromosome spacing and orientation were strikingly improved by the confinement of L-  
404 forms in narrow channels. An important conclusion from these experiments is that they  
405 exclude any models for chromosome segregation that invoke an essential requirement for  
406 specific interactions with the cell wall or cell poles.

407 Several well conserved proteins have been implicated in chromosome organization and or  
408 movement. The ParAB proteins play a reasonably well defined role in segregation of low  
409 copy number plasmids, and homologues are found in the chromosomes of most bacteria.  
410 Work on *Caulobacter* and sporulating cells of *B. subtilis* (Wu and Errington, 2003; Toro et al,  
411 2008; Shebelut et al 2010; Ptacin et al, 2010; Lim et al, 2014; Wang, 2014; Kloosterman) has  
412 revealed that these proteins have an active role in movement of origin regions towards cell  
413 poles. However, *Caulobacter* is unusual in having highly specialized cell poles and work here  
414 and in filamentous *B. subtilis* suggests that poles are not important outside of sporulation.  
415 The SMC or MukBEF protein complexes are also found in virtually all bacteria and appear to  
416 work by helping to self-condense chromosomes, inhibiting the formation of tangles.

417 However, how sister chromosomes come to occupy different spaces and ultimately move  
418 away from each other remains poorly understood in bacteria. Much recent work has  
419 focused on the role of entropic forces to drive segregation (Jun and Mulder, 2006; Jun and  
420 Wright, 2006; Mondal et al., 2011; Minina and Arnold, 2014; Shi and Huang, 2019). Dekker and  
421 colleagues have shown that chromosome size, configuration and positions are markedly  
422 influenced by the geometry of confinement in non-dividing walled cells perturbed in various  
423 ways (Wu et al., 2019a; 2019b). The behaviour of L-form nucleoids in our channel  
424 experiments generally support their findings. Importantly, our surprising observation of  
425 active and rapid re-centring of nucleoids after division further highlights the importance of  
426 biophysical effects in bacterial chromosome positioning and segregation.

#### 427 **Possible influence of the nucleoid in L-form division**

428 Several theoretical and practical papers have highlighted the possible role of  
429 macromolecules or nanoparticles in promoting the division of cells or vesicles (e.g. Yu and  
430 Granick, 2009; Terasawa et al., 2012). Based on these ideas it seemed possible that  
431 segregating nucleoids could drive the proliferation of L-forms by acting as nanoparticles.  
432 This would have an important knock-on effect in that it would ensure that progeny L-form  
433 cells contain at least one chromosome. However, our channel experiments showed that  
434 involvement of the nucleoid in L-form division is complex. First, our results provided further  
435 support for the old idea of “nucleoid occlusion”, in which the nucleoid has a localized  
436 negative effect on cell division, thereby helping to ensure that progeny cells have intact  
437 chromosomes (Mulder and Woldringh, 1989; Woldringh et al., 1991). While the recent  
438 identification of protein factors, such as Noc in *B. subtilis* and SlmA in *Escherichia coli*,  
439 provided the first molecular mechanisms for the nucleoid occlusion effect, it is also clear  
440 that in both organisms, the cell division machine is still biased away from the nucleoid in the  
441 absence of Noc or SlmA (Wu and Errington, 2004; Bernhardt and de Boer, 2005; Wu and  
442 Errington, 2012; Moriya et al., 2010). Importantly, our results clearly show that this bias also  
443 occurs for the FtsZ-independent division of L-forms, perhaps pointing to a more  
444 fundamental, biophysical basis for the effect, perhaps based on separation of nucleoid and  
445 cytoplasmic phases, or a change in the property of the membrane proximal to the nucleoid  
446 due to co- transcriptional translation and translocation (transertion) of membrane and  
447 secreted proteins.

448 The second apparent effect of the nucleoid was more surprising. In cell tubes in which  
449 replication or segregation was blocked, either spontaneously or by an inhibitor, chains of  
450 small anucleate cells were frequently generated by repeated sequential divisions adjacent  
451 to a nucleoid area, even in the narrow channels that do not normally support L-form  
452 division. This dramatic effect is reminiscent of a biophysical effect called pearling instability,  
453 which occurs when the membrane material in cylindrical lipid tubes is subject to tension,  
454 e.g. by the action of laser tweezers (Bar-Ziv and Moses, 1994; Nelson et al., 1995; Chen,  
455 2009), or the budding transition of phospholipid vesicles that leads to the formation of a  
456 chain of vesicles at the increase of the area-to-volume ratio (Käs and Sackmann, 1991). It  
457 seems possible that in L-forms these events occur because DNA normally contributes a large  
458 proportion of the total mass or effective volume of the cytoplasm. Assuming that synthesis  
459 of membrane and cytoplasm (all cell contents other than the nucleoid mass) continue at

460 their normal rates the loss of nucleoid expansion would give an overall increase in A/V,  
461 which we have shown previously to drive L-form proliferation (Mercier et al., 2013). That  
462 the pearling events always occurred in regions deficient in or devoid of DNA provides  
463 further strong evidence that nucleoids inhibit division. It is interesting to note that the  
464 possible role of DNA in cell volume regulation has been highlighted recently by experiments  
465 analysing the inflation of the *B. subtilis* forespore compartment by DNA import (Javier-Lopez  
466 et al., 2018).

467  
468 Finally, our findings have important implications for attempts to use L-form like division in  
469 the development of artificial cells. As well as providing further insights into the key  
470 parameters that need to be controlled to drive division, they also suggest that rates of DNA,  
471 cytoplasm and membrane synthesis all need to be properly balanced to efficiently  
472 coordinate division and chromosome segregation.

## 473 **METHODS**

### 474 **Bacterial Strains, Plasmids, and Growth Conditions**

475 The bacterial strains and plasmid constructs used in this study are shown in  
476 [Table S1](#). *B. subtilis* transformation was performed by the two-step starvation procedure as  
477 previously described (Anagnostopoulos and Spizizen, 1961; Hamoen et al., 2002).

478 Walled *B. subtilis* cells were grown on nutrient agar (NA, Oxoid) or in Luria-Bertani broth  
479 (LB). *B. subtilis* L-forms were grown in osmoprotective liquid medium NB/MSM at 30°C  
480 without shaking. The NB/MSM medium is composed of 2x magnesium-sucrose-maleic acid  
481 (MSM) pH7 (40 mM MgCl<sub>2</sub>, 1 M sucrose, and 40 mM maleic acid) mixed 1:1 with 2 x NB  
482 (nutrient broth). 0.8% xylose and 0.8 mM IPTG (Isopropyl β-D-1-thiogalactopyranoside)  
483 were added as needed. When necessary, antibiotics were added to media at the following  
484 concentrations: 5 µg/ml chloramphenicol, 5 µg/ml kanamycin; 55 µg/ml spectinomycin; 10  
485 µg/ml tetracycline; 1 µg/ml erythromycin; 25 µg/ml lincomycin and 200 µg/ml Penicillin G.  
486 L-form strains derived from LR2 were maintained in the L-form state by the addition of  
487 Penicillin G and omission of xylose in the growth medium, while those derived from RM121  
488 were stable L-forms and did not require the addition of Penicillin G.

### 489 490 **Protoplast and L-form preparation in Liquid medium**

491 Exponentially growing *B. subtilis* walled cells (OD<sub>600nm</sub> of 0.2~0.3) in LB medium with  
492 appropriate supplements were harvested and washed once in LB, then resuspended in  
493 NB/MSM containing lysozyme (2 mg/ml). The cells were incubated at 37°C with gentle  
494 shaking for 1 hr, or until all the rod-shaped cells have been protoplasted. The protoplasts  
495 were then diluted (1 in 5000) in NB/MSM containing 200 µg/ml PenG, and grown at 30°C  
496 without shaking for 2 to 4 days, during which time the protoplasts would transit into L-  
497 forms. The freshly generated L-forms were diluted at least twice in the same medium and  
498 cultured at 30°C, before being used for further experiments.

### 499 500 **Microfluidic system and microscopy**

501 Microfluidic experiments were carried out using a device produced in-house based on that  
502 described by Moffitt et al (Moffitt et al., 2012; Eland et al., 2016; Figure S1). Each  
503 microfluidic design (chip) contains a set of 3 tracks of different widths, repeated and  
504 grouped into 15 µm x 20 µm blocks divided by gutters. The channel widths for the agarose

505 microfluidic chips used are: Chip No.2 (previously: 0.8, 0.9 and 1.0  $\mu\text{m}$ ; new: 0.6, 0.7 and 0.8  
506  $\mu\text{m}$ ); Chip No.6 (1, 1.2 and 1.4  $\mu\text{m}$ ); Chip No. 7 (1.8, 2.0 and 2.2  $\mu\text{m}$ ) and Chip No.33 (0.6, 0.7  
507 and 0.8  $\mu\text{m}$  interrupted by diamond shapes). The diamond shapes in Chip No.33 were  
508 spaced 20  $\mu\text{m}$  apart (measured from centre to centre) and measure 3.4  $\mu\text{m}$  at the widest  
509 point. The designs were initially created on L-edit software and transferred onto a silicon  
510 wafer using lithography and deep reactive-ion etching (DRIE), followed by backfilling with a  
511 coating of Tetraethyl orthosilicate oxide (TEOS oxide) to produce channels of the desired  
512 dimensions (Lionex Ltd). Using TEOS oxide backfill negates the need to use expensive e-  
513 beam lithography. Replica moulding of the silicon wafer with hard PDMS was used to create  
514 the intermediate mould used to transfer the pattern onto the agarose. Patterned agarose  
515 pads, with channels  $\sim 1.6$   $\mu\text{m}$  high, were cast using an intermediate PDMS mould and an  
516 'agarose casting mould' made of PDMS, with 4% low melting point agarose (SeaPlague GTG  
517 Agarose from Lonsza, gelling temp 26–30°C) in growth medium containing 1x MSM and 1/5x  
518 NB, which then set slowly at 30°C for 1 – 2h.

519 The structural part of the device, the PDMS chamber block, was cast using a custom  
520 designed and milled aluminium mould that matches the size of the mould for casting the  
521 agarose pad. Plasma-bonding of the PDMS chamber block to a long cover glass (Agar  
522 Scientific Ltd, L4239-2, Coverglass 35x64 mm No.1.5) created a sample chamber. The cover  
523 glass which formed the bottom of the sample chamber was coated with BSA (0.5 mg/ml)  
524 and allowed to dry. 5  $\mu\text{l}$  of concentrated L-form culture was added onto the cover glass in  
525 the sample chamber, then the patterned agarose pad placed (patterned side down) onto  
526 the cells in the sample chamber, trapping bacterial cells in the channels of the agarose pad.  
527 The chamber was then sealed with a plasma-treated cover glass (Agar Cientific Ltd, L46s20-  
528 5, coverglass 20x20 mm No.5) to the top of the agarose pad. The assembly was left at 30°C  
529 for 20 min to allow plasma bond to set. The PDMS chamber block also contained two buffer  
530 reservoirs on either side of, and connected to, the sample chamber, one for imputing fresh  
531 medium and the other as the outlet of the spent medium and bacterial cells that were not  
532 confined in the tracks. Modified growth medium with 1/5x strength of NB was supplied  
533 continuously through the inlet reservoir from a 50 ml syringe, controlled by a syringe pump  
534 at a speed of 1 ml/h using the WinPump Term software (New Era).

535 Microscopy was performed on a Nikon Eclipse Ti inverted fluorescence microscope  
536 System, fitted with an Apo TIRF objective (Nikon 60x/1.49 Oil), as described previously  
537 ((Kawai et al., 2015)). All time-lapse experiments were carried out at 32°C unless otherwise  
538 indicated. For experiments with the DNA replication inhibitor HB-EMAu (N3-hydroxybutyl 6-  
539 (3' -ethyl-4' -methylanilino) uracil; Tarantino et al., 1999), freshly growing L-form culture  
540 was mixed with the inhibitor at 3  $\mu\text{g}/\text{ml}$  then loaded into the microfluidic devices.  
541 Sometimes the mixture was incubated at 30°C from 30 to 40 min prior to loading. The  
542 inhibitor was also added to the flow medium at the same concentration to maintain the  
543 inhibition.

544 Time-lapse microscopy of L-forms growing in liquid medium was performed using ibiTreat,  
545 35 mm sterile glass bottom microwell, on a DeltaVision<sup>®</sup>RT microscope (Applied Precision,  
546 Washington, USA) as described by Domínguez-Cuevas et al. (Domínguez-Cuevas et al.,  
547 2012). Briefly, 200  $\mu\text{l}$  of L-form cells were placed in the dish and leave to stand for 10 min.  
548 To adhere the cells to the surface of the glass dish, the dish was centrifuged at 100 g for 5  
549 min using a Beckman Allegra X-12R centrifuge.

## 550 **Quantitative image analysis**

551 Movies were prepared for quantitative analysis in the following steps. Images were  
552 registered to correct for drift using FIJI/ ImageJ StackReg (Schindelin et al, 2012). Images  
553 were manually rotated such that the microchannels were precisely vertical (FIJI, bicubic  
554 interpolation). Images were background subtracted using FIJI paraboloid rolling ball, radius  
555 50. Cell in each agarose channel were then manually quality controlled to exclude channels  
556 initially loaded with more than one cell, or cells where overgrowth from adjacent channels  
557 obscured the cell growth in that channel. Cropped data from individual quality controlled  
558 channels were then exported for quantitative analysis in MATLAB.

559 Nucleoids from cells in each channel were segmented using Otsu's method. Spurs/  
560 connecting noise pixels were removed using image opening with a disk radius 1. Shape and  
561 size parameters for segmented nucleoids were then calculated. Cell size was measured by  
562 square root of area rather than area because it is a linear quantity. Nucleoid separation was  
563 measured as the distance between the centroids of vertically adjacent nucleoids. Nucleoid  
564 angle was measured as the angle between vertically adjacent nucleoids, defined such that  
565 the angle between two vertically aligned cells was zero degrees. Nucleoid eccentricity was  
566 estimated as  $e=(\text{minor axis length})/(\text{major axis length})$  of the binary object.

567 Confidence intervals in Figure 3G, I were estimated by bootstrapping.

568 Due to the large size of the dataset ( $n=17766$  nucleoids) outliers or low frequency extrema  
569 were observed in the data. In order to visualise average trends in the data, in Figures 3F, H  
570 and S3D, E, it was necessary to zoom in to less than the full data range. The full extent of the  
571 data are shown in Figure S6B-E.

572

573

574

## 575 **ACKNOWLEDGEMENTS**

576 We would like to thank Drs Neal Brown and George Wright for the gift of HB-EMAu, and Dr  
577 J-W Veening for the HU-mCherry and HU-GFP strains. We also thank the Moffitt lab for help  
578 and advice on the agarose-based microfluidic system, and John Hedley and Neil Keegan for  
579 their advice on the manufacturing of microfluidic moulds. Work in the Errington lab was  
580 funded by a Wellcome Investigator Award (209500) and a European Research Council Award  
581 (670980). Work in the Wipat lab was funded by grants from the UK EPSRC (grants  
582 EP/N031962/1, EP/K039083/1 and EP/J02175X/1).

## 583 **AUTHOR CONTRIBUTIONS**

584 L.J.W. and J.E. designed the study. L.J.W. did most of the experiments. S.L. carried out the  
585 cell growth rate measurements. S.P., L.E. and A.W. contributed to establishment and  
586 development of the microfluidic systems. SH and L.J.W. carried out quantitative image analysis.  
587 L.J.W, S.H. and J.E. analysed data and drafted the manuscript.

588

589

## 590 **DECLARATION OF INTERESTS**

591 The authors declare no competing interests.

592

593

594

## 595 REFERENCES

596 Akira, S., Uematsu, S., and Takeuchi, O. (2006). Pathogen recognition and innate immunity.  
597 *Cell* 124, 783-801.

598

599 Allan, E.J., Hoischen, C., and Gumpert, J. (2009). Bacterial L-forms. *Adv Appl Microbiol* 68, 1-  
600 39.

601

602 Anagnostopoulos, C., and Spizizen, J. (1961). Requirements for transformation in *Bacillus*  
603 *subtilis*. *J Bacteriol* 81, 741-746.

604

605 Arjes, H.A., Kriel, A., Sorto, N.A., Shaw, J.T., Wang, J.D., and Levin, P.A. (2014). Failsafe  
606 mechanisms couple division and DNA replication in bacteria. *Curr Biol* 24, 2149-2155.

607

608 Bar-Ziv, R., and Moses, E. (1994). Instability and "pearling" states produced in tubular  
609 membranes by competition of curvature and tension. *Phys Rev Lett* 73, 1392-1395.

610

611 Bernhardt, T.G., and de Boer, P.A. (2005). SlmA, a nucleoid-associated, FtsZ binding protein  
612 required for blocking septal ring assembly over chromosomes in *E. coli*. *Mol Cell* 18, 555-  
613 564.

614

615 Blain, J.C., and Szostak, J.W. (2014). Progress toward synthetic cells. *Annu Rev Biochem* 83,  
616 615-640.

617

618 Briers, Y., Walde, P., Schuppler, M., and Loessner, M.J. (2012). How did bacterial ancestors  
619 reproduce? Lessons from L-form cells and giant lipid vesicles: Multiplication similarities  
620 between lipid vesicles and L-form bacteria. *Bioessays*.

621

622 Brown, N.C. (1971). Inhibition of bacterial DNA replication by 6-(*p*-hydroxyphenylazo)-uracil:  
623 differential effect on repair and semi-conservative synthesis in *Bacillus subtilis*. *J Mol Biol* 59,  
624 1-16.

625

626 Caspi, Y., and Dekker, C. (2014). Divided we stand: splitting synthetic cells for their  
627 proliferation. *Syst Synth Biol* 8, 249-269.

628

629 Chen, I.A. (2009). Cell division: breaking up is easy to do. *Curr Biol* 19, R327-328.

630

631 Domingue, G.J. (2010). Demystifying pleomorphic forms in persistence and expression of  
632 disease: Are they bacteria, and is peptidoglycan the solution? *Discov Med* 10, 234-246.

633

634 Domingue, G.J., Sr., and Woody, H.B. (1997). Bacterial persistence and expression of  
635 disease. *Clin Microbiol Rev* 10, 320-344.

636



- 637 Domínguez-Cuevas, P., Mercier, R., Leaver, M., Kawai, Y., and Errington, J. (2012). The rod to  
638 L-form transition of *Bacillus subtilis* is limited by a requirement for the protoplast to escape  
639 from the cell wall sacculus. *Mol Microbiol* 83, 52-66.  
640
- 641 Egan, A.J., Cleverley, R.M., Peters, K., Lewis, R.J., and Vollmer, W. (2017). Regulation of  
642 bacterial cell wall growth. *FEBS J* 284, 851-867.  
643
- 644 Eland, L.E., Wipat, A., Lee, S., Park, S., and Wu, L.J. (2016). Chapter 3 - Microfluidics for  
645 bacterial imaging. In *Methods in Microbiology*, C. Harwood, and G.J. Jensen, eds. (Academic  
646 Press), pp. 69-111.  
647
- 648 Errington, J. (2013). L-form bacteria, cell walls and the origins of life. *Open biology* 3,  
649 120143.  
650
- 651 Errington, J., Mickiewicz, K., Kawai, Y., and Wu, L.J. (2016). L-form bacteria, chronic diseases  
652 and the origins of life. *Philos Trans R Soc Lond B Biol Sci* 371.  
653
- 654 Errington, J., and Wu, L.J. (2017). Cell cycle machinery in *Bacillus subtilis*. *Subcell Biochem*  
655 84, 67-101.  
656
- 657 Gumpert, J., and Taubeneck, U. (1983). Characteristic properties and biological significance  
658 of stable protoplast type L-forms. *Experientia Suppl* 46, 227-241.  
659
- 660 Hamoen, L.W., Smits, W.K., de Jong, A., Holsappel, S., and Kuipers, O.P. (2002). Improving  
661 the productive value of the competence transcription factor (ComK) binding site in *Bacillus*  
662 *subtilis* using a genomic approach. *Nucleic Acids Res* 30, 5517-5528.  
663
- 664 Hutchison, C.A., 3rd, Chuang, R.Y., Noskov, V.N., Assad-Garcia, N., Deerinck, T.J., Ellisman,  
665 M.H., Gill, J., Kannan, K., Karas, B.J., Ma, L., *et al.* (2016). Design and synthesis of a minimal  
666 bacterial genome. *Science* 351, aad6253.  
667
- 668 Kaimer, C., Gonzalez-Pastor, J.E., and Graumann, P.L. (2009). SpoIIIE and a novel type of  
669 DNA translocase, SftA, couple chromosome segregation with cell division in *Bacillus subtilis*.  
670 *Mol Microbiol* 74, 810-825.  
671
- 672 Kandler, G., and Kandler, O. (1954). [Studies on morphology and multiplication of  
673 pleuropneumonia-like organisms and on bacterial L-phase, I. Light microscopy]. *Arch*  
674 *Mikrobiol* 21, 178-201.  
675
- 676 Kawai, Y., Mercier, R., and Errington, J. (2014). Bacterial cell morphogenesis does not  
677 require a preexisting template structure. *Curr Biol* 24, 863-867.  
678
- 679 Kawai, Y., Mercier, R., Wu, L.J., Dominguez-Cuevas, P., Oshima, T., and Errington, J. (2015).  
680 Cell growth of wall-free L-form bacteria is limited by oxidative damage. *Curr Biol* 25, 1613-  
681 1618.  
682

- 683 Kohler, P., and Marahiel, M.A. (1997). Association of the histone-like protein HBsu with the  
684 nucleoid of *Bacillus subtilis*. *J Bacteriol* *179*, 2060-2064.
- 685
- 686 Leaver, M., Dominguez-Cuevas, P., Coxhead, J.M., Daniel, R.A., and Errington, J. (2009). Life  
687 without a wall or division machine in *Bacillus subtilis*. *Nature* *457*, 849-853.
- 688
- 689 Leaver, M., and Errington, J. (2005). Roles for MreC and MreD proteins in helical growth of  
690 the cylindrical cell wall in *Bacillus subtilis*. *Mol Microbiol* *57*, 1196-1209.
- 691
- 692 Lewis, P.J., Thaker, S.D., and Errington, J. (2000). Compartmentalization of transcription and  
693 translation in *Bacillus subtilis*. *EMBO J* *19*, 710-718.
- 694
- 695 Mercier, R., Kawai, Y., and Errington, J. (2013). Excess membrane synthesis drives a primitive  
696 mode of cell proliferation. *Cell* *152*, 997-1007.
- 697
- 698 Mercier, R., Kawai, Y., and Errington, J. (2014). General principles for the formation and  
699 proliferation of a wall-free (L-form) state in bacteria. *eLife* *3*.
- 700
- 701 Moffitt, J.R., Lee, J.B., and Cluzel, P. (2012). The single-cell chemostat: an agarose-based,  
702 microfluidic device for high-throughput, single-cell studies of bacteria and bacterial  
703 communities. *Lab Chip* *12*, 1487-1494.
- 704
- 705 Moriya, S., Rashid, R.A., Rodrigues, C.D., and Harry, E.J. (2010). Influence of the nucleoid and  
706 the early stages of DNA replication on positioning the division site in *Bacillus subtilis*. *Mol*  
707 *Microbiol* *76*, 634-647.
- 708
- 709 Mulder, E., and Woldringh, C.L. (1989). Actively replicating nucleoids influence positioning of  
710 division sites in *Escherichia coli* filaments forming cells lacking DNA. *J Bacteriol* *171*, 4303-  
711 4314.
- 712
- 713 Nelson, P., Powers, T., and Seifert, U. (1995). Dynamical theory of the pearling instability in  
714 cylindrical vesicles. *Phys Rev Lett* *74*, 3384-3387.
- 715
- 716 Peterlin, P., Arrigler, V., Kogej, K., Svetina, S., and Walde, P. (2009). Growth and shape  
717 transformations of giant phospholipid vesicles upon interaction with an aqueous oleic acid  
718 suspension. *Chem Phys Lipids* *159*, 67-76.
- 719
- 720 Rajagopal, M., and Walker, S. (2017). Envelope structures of Gram-positive bacteria. *Curr*  
721 *Top Microbiol Immunol* *404*, 1-44.
- 722
- 723 Rojas, E.R., and Huang, K.C. (2017). Regulation of microbial growth by turgor pressure. *Curr*  
724 *Opin Microbiol* *42*, 62-70.
- 725
- 726 Sharpe, M.E., and Errington, J. (1998). A fixed distance for separation of newly replicated  
727 copies of *oriC* in *Bacillus subtilis*: implications for co-ordination of chromosome segregation  
728 and cell division. *Mol Microbiol* *28*, 981-990.
- 729

730 Sharpe, M.E., Hauser, P.M., Sharpe, R.G., and Errington, J. (1998). *Bacillus subtilis* cell cycle  
731 as studied by fluorescence microscopy: constancy of the cell length at initiation of DNA  
732 replication and evidence for active nucleoid partitioning. *J Bacteriol* *180*, 547-555.  
733  
734 Studer, P., Staubli, T., Wieser, N., Wolf, P., Schuppler, M., and Loessner, M.J. (2016).  
735 Proliferation of *Listeria monocytogenes* L-form cells by formation of internal and external  
736 vesicles. *Nature communications* *7*, 13631.  
737  
738 Svetina, S. (2009). Vesicle budding and the origin of cellular life. *Chemphyschem* *10*, 2769-  
739 2776.  
740  
741 Tarantino, P.M., Jr., Zhi, C., Wright, G.E., and Brown, N.C. (1999). Inhibitors of DNA  
742 polymerase III as novel antimicrobial agents against gram-positive eubacteria. *Antimicrob*  
743 *Agents Chemother* *43*, 1982-1987.  
744  
745 Terasawa, H., Nishimura, K., Suzuki, H., Matsuura, T., and Yomo, T. (2012). Coupling of the  
746 fusion and budding of giant phospholipid vesicles containing macromolecules. *Proc Natl*  
747 *Acad Sci U S A* *109*, 5942-5947.  
748  
749 Woldringh, C.L., Mulder, E., Huls, P.G., and Vischer, N. (1991). Toporegulation of bacterial  
750 division according to the nucleoid occlusion model. *Res Microbiol* *142*, 309-320.  
751  
752 Wu, L.J., and Errington, J. (2004). Coordination of cell division and chromosome segregation  
753 by a nucleoid occlusion protein in *Bacillus subtilis*. *Cell* *117*, 915-925.  
754  
755 Wu, L.J., and Errington, J. (2012). Nucleoid occlusion and bacterial cell division. *Nature*  
756 *Reviews Microbiology* *10*, 8-12.  
757  
758 Young, K.D. (2006). The selective value of bacterial shape. *Microbiol Mol Biol Rev* *70*, 660-  
759 703.  
760  
761 Yu, Y., and Granick, S. (2009). Pearling of lipid vesicles induced by nanoparticles. *J Am Chem*  
762 *Soc* *131*, 14158-14159.  
763  
764 Zhao, H., Patel, V., Helmann, J.D., and Dorr, T. (2017). Don't let sleeping dogmas lie: new  
765 views of peptidoglycan synthesis and its regulation. *Mol Microbiol* *106*, 847-860.  
766

## 767 **FIGURE LEGENDS**

768 **Figure 1.** Unconstrained L-form growth in liquid and in microfluidic devices.

769 (A) L-forms growing unrestrained in liquid medium. The figure shows still images from time-  
770 lapse microscopy (from Movie 1) of L-form cells of strain 4740 (LR2 *Pspac-dnaA*  $\Omega$ *amyE::neo*  
771 *hbsU-gfp*) growing in a glass bottomed dish at 30°C. Yellow arrows point to discrete  
772 nucleoids and red arrows point to cells devoid of DNA. Scale bar, 5  $\mu$ m.

773 (B) L-form cells of strain: 4745 (RM121  $\Omega$ *amyE::hbsU-mCherry rpoC-gfp*) growing in the  
774 gutter of a microfluidic system. Example of a series of still images from a time-lapse  
775 experiment in which the cells stayed relatively in focus (Movie 2). A daughter bleb with no  
776 chromosome is ringed in yellow. For both (A) and (B) each panel shows bright field images  
777 on top, chromosomal DNA labelled with HU-mCherry in the middle, and a merge of the two  
778 (DNA in green in (A) and red in (B)) at the bottom. The time points (min) of the selected still  
779 images from the time-lapse experiment are shown above the images. Scale bar, 5  $\mu$ m.

780 (C). Growth of walled (strain 4742; LR2  $\Omega$ *amyE::neo hbsU-gfp aprE::P<sub>rpsD</sub>-mcherry spc*  
781  $\Delta$ *xyIR::tet*) and L-form (strain 4739; LR2  $\Omega$ *amyE::neo hbsU-gfp*) *B. subtilis* in microfluidic  
782 channels. The pair of images to the left were taken before the time-lapse imaging, showing  
783 the mCherry signal in the walled cells on the left (yellow arrows), and two L-form cells that  
784 do not express mCherry on the right (red arrows). Short green lines mark division sites. The  
785 time points of the selected still images from the time-lapse experiment (5 min intervals) are  
786 shown above each image. Scale bar, 5  $\mu$ m.

787 (D). Growth rates, shown as doubling time (min), of walled and L-form strains in channels of  
788 different widths. R: walled cells; L: L-forms. Channel widths (nm) are indicated in brackets.

789

790 **Figure 2.** Effect of channel width on L-form division.

791 (A) Lack of division in narrow microfluidic channels. Selected still bright field images of a  
792 time-lapse experiment. L-form cells of strain 4739 (LR2  $\Omega$ *amyE::neo hbsU-gfp*) were loaded  
793 into microfluidic chamber (Chip No. 2; channel widths 0.8, 0.9 and 1.0  $\mu$ m) and grown at  
794 32°C. Images were captured every 5 min. The small cell on the left was in a 0.9  $\mu$ m channel;  
795 the large cell on the right was in a 1.0  $\mu$ m channel. Full set of still images from this time-  
796 lapse series is shown in Figure S2. Scale bar, 5  $\mu$ m.

797 (B) In wide channels cell division occurred more frequently. Selected still bright field frames  
798 from a time-lapse experiment. The cell shown was in the 2.2  $\mu$ m wide channel (Chip No. 7).  
799 Red stars label cells that escaped from the channel. Strain: 4739 (LR2  $\Omega$ *amyE::neo hbsU-*  
800 *gfp*). Scale bar, 5  $\mu$ m.

801 (C) Division frequency of L-forms grown in narrow vs wide channels. Only 'in-channel'  
802 division events were scored. [Tabulated data.]

803

804 **Figure 3.** Effect of channel width on nucleoid appearance and arrangement in L-forms.

805 (A, C) Regular chromosome segregation in narrow microfluidic channels. Selected still  
806 images of the same time-lapse experiment shown in Figure 2A. For each time frame (time  
807 indicated above the images) shown a set of 2 images are presented: a HU-GFP image  
808 showing the nucleoids on the left and the merge of the GFP image and the corresponding  
809 bright field image on the right. The small cell on the left was in a 0.9  $\mu\text{m}$  channel; the large  
810 cell on the right was in a 1.0  $\mu\text{m}$  channel. Full set of still images from this time-lapse series is  
811 shown in Figure S2. Yellow boxed region is enlarged and shown in Figure 3C. An un-  
812 processed GFP image at t80 min is shown to the left in Figure 3C. Scale bar, 5  $\mu\text{m}$ .

813 (B, D) Irregular chromosome arrangement in wide channels. In wide channels chromosome  
814 distribution is irregular. These are selected still frames from Movie 4. Each time frame  
815 shows a HU-GFP image showing the nucleoids on the left and the merge of the GFP image  
816 and the corresponding bright field image on the right. The cell shown was in a 2.0  $\mu\text{m}$  wide  
817 channel (Chip No. 7). Arrowheads: chromosomes lying horizontally or perpendicularly.  
818 Strain: 4739 (LR2  $\Omega\text{amyE}::\text{neo hbsU-gfp}$ ). Yellow boxed region is enlarged and shown in  
819 Figure 3D. An un-processed GFP image at t50 min is shown to the left in Figure 3D. Scale bar,  
820 5  $\mu\text{m}$ .

821 (E) Chromosome arrangement in Chip No.33 which contained alternating narrow channels  
822 and diamond shapes. These are selected still frames from Movie 6. Each time frame shows a  
823 bright field image on the left and chromosomal DNA labelled with HU-GFP on the right.  
824 Strain: 4741 (LR2  $\Omega\text{amyE}::\text{neo hbsU-gfp aprE}::P_{\text{rpsD}}\text{-mcherry spc}$ ). Brackets indicate regions  
825 where chromosomes appear regularly distributed. Scale bars, 5  $\mu\text{m}$ .

826 (F – I) Quantitative analysis shows that spatial confinement of L-forms can reproduce near-  
827 native nucleoid segregation.

828 (F) Nucleoid size, as measured by the square root of nucleoid area, for walled cells (Rod,  
829 red) and L-forms in different channel widths (black).

830 (G) Scatter plot of square root of nucleoid area versus channel width for walled cells (red)  
831 and L-forms (black).

832 (H) Nucleoid separation for walled cells (Rod, red) and L-forms in different channel widths  
833 (black).

834 (I) Scatter plot of nucleoid separation versus channel width.  
835 Blue line in (G) & (I): linear fit to the L-form data. For walled cells (red) in (G) & (I), the  
836 “channel width” was set to 850 nm to match the known cell width. Violin plots: Circles  
837 indicate median, bars indicate upper and lower quartile. Scatter plots: Circles indicate  
838 median, error bars indicated 95 % confidence interval from bootstrapping. n=17766 time-  
839 lapse observations of nucleoids descended from 45 mother cells in separate agarose  
840 channels.

841 **Figure 4:** Bisection of chromosomes occurs occasionally in L-forms. A small cell with little  
842 DNA (arrowheads in Frame 130 min) appeared to be not growing, possibly because its  
843 chromosome is incomplete. These are selected still frames from Movie 7. The cell shown

844 was in a 1.8  $\mu\text{m}$  wide channel (Chip No. 7). Arrows point to division between nucleoids;  
845 arrowheads point to possible division through nucleoids.

846 **Figure 5:** DNA deficiency leads to DNA-free pearling division in channel-confined L-forms.

847 (A and B) DNA-less 'beads' produced by L-form in narrow channels under normal growth  
848 conditions. Scale bars, 5  $\mu\text{m}$ . Brackets: DNA-free, bead-like cells.

849 (A) Cells in the gutter grew into the narrow channels with the mass of the nucleoid excluded  
850 from entry, generating strings of DNA-less beads in narrow channels. A bright field image is  
851 shown on the top left, chromosomal DNA labelled with HU-GFP on the top right, and a  
852 merge of the two on the bottom right (GFP in green). Yellow boxed region is enlarged and  
853 shown at the bottom left. These are selected still frames from Movie 11. Strain 4739 (LR2  
854  *$\Omega$ amyE::neo hbsU-gfp*).

855 (B) Small DNA-less cells in narrow channels. Each time frame shows bright field images on  
856 the left and chromosomal DNA labelled with HU-GFP on the right. Yellow boxed region is  
857 enlarged and shown on the left. Strain 4742 (LR2  *$\Omega$ amyE::neo hbsU-gfp aprE::P<sub>rpsD</sub>-mcherry*  
858 *spc*).

859 (C) A cell, appeared to be defective in chromosome replication (for unknown reason),  
860 produced many small DNA-free daughter cells of various sizes. These are selected still  
861 frames from Movie 10. The cell shown was in a 2.2  $\mu\text{m}$  wide channel (Chip No. 7). Each time  
862 frame shows bright field images on the left and chromosomal DNA labelled with HU-  
863 mCherry on the right. Strain: 4739 (LR2  *$\Omega$ amyE::neo hbsU-gfp*). Scale bars, 5  $\mu\text{m}$ .

864 (D) and (E) Examples of L-forms inhibited for DNA replication generating regular pearling (D)  
865 or large DNA-free cells (E) in the DNA deficient regions in narrow channels. L-forms of strain  
866 4739 (LR2  *$\Omega$ amyE::neo hbsU-gfp*) were grown in the presence of the DNA replication  
867 inhibitor HB-EmAu in liquid culture and after introduction into a microfluidic device. These  
868 are selected still frames from Movie 11 (for D) and 12 (for E). Red arrows in (E) shows  
869 anucleate cells dividing. Scale bars, 5  $\mu\text{m}$ .

870 **Figure 6:** Re-centring of the single nucleoid after asymmetric division in narrow channels.

871 (A) Selected still images showing a single-nucleate cell growing and dividing in the narrow  
872 channel. The merge of the bright field image and the green fluorescence image of the  
873 chromosomal DNA labelled with HU-GFP (GFP in green) is shown. After division the  
874 asymmetrically located nucleoid moved towards the distal pole to re-centre itself. L-forms  
875 of strain 4739 (LR2  *$\Omega$ amyE::neo hbsU-gfp*) were grown in the presence of the DNA  
876 replication inhibitor HB-EmAu in liquid culture and after introduction into a microfluidic  
877 device. 3 min per frame. Scale bars, 5  $\mu\text{m}$ .

878 (B) Distances of the nucleoid to the two cell poles over a 2.5 h time course. The distance  
879 (arbitrary unit) between the polar edge of the nucleoid to the nearest pole was measured.  
880 Division that occurred at Frame 42 is marked by arrows.

881

## 882 SUPPLEMENTAL FIGURE AND VIDEO LEGENDS

883 **Figure S1** The agarose-based microfluidic device adapted from that of Moffitt et al (2012).  
884 Related to Figures 2 to 6. (A, B): Schematic diagrams of the microfluidic system and agarose  
885 chips (not to scale). (A) Top: Front cross section view of a partially assembled device.  
886 Bonding of the PDMS block to the bottom cover glass creates a chamber ready for cells and  
887 the printed agarose pad. The chamber is connected to the reservoirs on the two sides.  
888 Bottom: An additional cover glass is laid over the agarose pad, and compresses and seals the  
889 device. Cells are confined between the patterned agarose pad and the glass bottom  
890 coverslip. Medium flows pass both ends of the channels and removes cells as they emerge  
891 from the channels. (B) Top panel: a section of an agarose chip shown here upside-down  
892 before being bonded to a cover glass. Each chip consists of sections of tracks. Each section  
893 of tracks is  $\sim 100 \times 100 \mu\text{m}$ , containing repeats of a set of three tracks of slightly different  
894 widths (0.8, 0.9 and  $1.0 \mu\text{m}$ , for example) and are grouped into  $15 \mu\text{m} \times 20 \mu\text{m}$  blocks divided  
895 by gutters. After being mounted onto a cover glass (bottom panel), the glass forms the  
896 bottom of the channel. The channel has agarose as the sides and the top, and is open on  
897 one end or both ends to the gutter.

898 (C, D, E) SEM images of the surface pattern that is replica moulded onto the agarose pad  
899 using the intermediate mould. As agarose cannot be easily imaged with SEM, PDMS was  
900 moulded against the intermediate and cured to check the dimensions and structure of the  
901 surface pattern. (C) A zoomed out view to show the repeating pattern of the modules, each  
902 individually numbered so locations can be monitored. The darker stripes running left to right  
903 are the gutters, through which medium flows. The gutters are  $40 \mu\text{m}$  wide. (D) The  
904 repeating unit, this image shows Chip No.33. (E) A tilted view of Chip No.33 to highlight the  
905 depth of the channel features ( $1.6 \mu\text{m}$ ) compared to that of the gutters ( $40 \mu\text{m}$ ).

906 **Figure S2:** Regular chromosome segregation in narrow microfluidic channels. Related to  
907 Figure 2A, 3A and 3C. Full set of still images of a time-lapse experiment presented in Figure  
908 2A and 3A. L-form cells of strain 4739 (LR2  $\Omega amyE::neo hbsU-gfp$ ) were loaded into  
909 microfluidic chamber (Chip No. 2; channel widths 0.8, 0.9 and  $1.0 \mu\text{m}$ ) and grown at  $32^\circ\text{C}$ .  
910 Images were captured every 5 min. For each frame shown a set of 3 images are presented: a  
911 bright field images on the left, a HU-GFP image showing the nucleoids in the middle and the  
912 merge on the left. For the last time frame (Frame 26) an extra image of the nucleoids, with  
913 increased brightness to show the DNA in cells exiting the channel, is shown to the right. The  
914 small cell on the left was in a  $0.9 \mu\text{m}$  channel; the large cell on the right was in a  $1.0 \mu\text{m}$   
915 channel Arrows: un-resolved chromosomal mass.

916 **Figure S3:** L-form division and chromosome distribution in microfluidic channels of various  
917 widths. Related to Figure 3.

918 (A) In wide channels cell division occurred more frequently. However, chromosomes are not  
919 well separated and are distributed irregularly. These are selected still frames from Movie 3.  
920 Each time frame shows bright field images on the left and chromosomal DNA labelled with  
921 HU-GFP on the right. The cell shown was in a  $2.0 \mu\text{m}$  wide channel (Chip No. 7). Red  
922 arrowheads: chromosomes lying horizontally or perpendicularly. Yellow arrows point to

923 regions of membrane constrictions. The daughter cell that escaped from the channel is  
924 marked with a red star. Strain: 4739 (LR2  $\Omega$ amyE::*neo hbsU-gfp*).

925 (B) Chromosomes became separated and more regularly distributed in the narrow parts of  
926 the wide cell (red brackets) where membrane constrictions persisted. The images are  
927 selected still frames from Movie 5, shown as the merge of the GFP image (green) and the  
928 bright field image (grey scale). The cell shown was in a 1.4  $\mu$ m wide channel (Chip No. 6).  
929 Strain: 4739 (LR2  $\Omega$ amyE::*neo hbsU-gfp*).

930 (C) In Chip No.33 which contained alternating narrow channels and diamond shapes, dis-  
931 organised chromosomes in the diamond parts became regularly distributed in the straight  
932 and narrow channels. These are selected still frames from Movie 6. Each time frame shows  
933 bright field images on the left and chromosomal DNA labelled with HU-GFP on the right. The  
934 channel width for the cell shown was 700 nm. Strain: 4741 (LR2  $\Omega$ amyE::*neo hbsU-gfp*  
935 *aprE::P<sub>rpsD</sub>-mcherry spc*). Yellow arrowheads indicates two nucleoids in different orientations  
936 in the diamond region.

937 Brackets in B & C indicate regions where chromosomes appear regularly distributed. Scale  
938 bars, 5  $\mu$ m.

939 (D) & (E): Nucleoid circularity (D) and width (E) for walled cells (red; Rod) and L-forms (black)  
940 in different channel widths. Violin plots: Circles indicate median, bars indicate upper and  
941 lower quartile. Scatter plots: Circles indicate median, error bars indicated 95 % confidence  
942 interval from bootstrapping.  $n=17766$  time-lapse observations of nucleoids descended from  
943 45 mother cells in separate agarose channels.

944

945 **Figure S4:** Bisection of chromosomes occurs occasionally in L-forms. Related to Figure 4.

946 A chromosome appeared to have been bisected by division, with two small lobes of DNA  
947 (arrowheads in Frame 19) retained at the extreme ends of the cell where division has  
948 occurred (red arrows in Frames 85 and 90 min). These are selected still frames from Movie  
949 8. The cell shown was in a 1.8  $\mu$ m wide channel (Chip No. 7). Each time frame shows bright  
950 field images on the left, chromosomal DNA labelled with HU-GFP in the middle, and a merge  
951 of the two on the right (GFP in green). Yellow arrows point to regions of membrane  
952 constrictions. 5 mins between frames. Strain: 4739 (LR2  $\Omega$ amyE::*neo hbsU-gfp*). Scale bars, 5  
953  $\mu$ m.

954 **Figure S5:** Re-centring of the single nucleoid in cells inhibited for DNA replication.

955 (A) A fuller set of still images of a time-lapse experiment presented in Figure 6. The  
956 merge of the bright field image and the green fluorescence image of the chromosomal DNA  
957 labelled with HU-GFP (GFP in green) is shown. After division the nucleoid moved towards  
958 the distal pole to re-centre itself. L-forms of strain 4739 (LR2  $\Omega$ amyE::*neo hbsU-gfp*) were  
959 grown in the presence of the DNA replication inhibitor HB-EmAu in liquid culture and after  
960 introduction into a microfluidic device. 3 min per frame. Scale bars, 5  $\mu$ m.

961 (B, C) Another example of the single nucleoid re-centring after division.



962 **Figure S6:** Further quantitative analysis of nucleoid shape.

963 (A) Exemplar nucleoid segmentations for walled cells (left) and L-form cells in a 2.2  $\mu\text{m}$   
964 wide channel (right).

965 (B-D) Violin plots showing full data range including outliers and extrema for Figures 3F, H  
966 and S3D.

967 (E) Distribution of inter-nucleoid angle for all cells. Low frequency long tail of angles greater  
968 than 5 degrees not shown in order to visualize average trends.

969

970 **Movie 1:** L-forms grow out of focus when unstrained in liquid medium. Related to Figure 1A.  
971 A time-lapse experiment showing growth and chromosomes of L-form *B. subtilis* when  
972 growing unstrained in liquid medium in a glass-bottomed dish at 30°C. Chromosomes  
973 (green, merged with bright field images) soon became difficult to observe as the cells grew  
974 and divided in multiple directions. Strain: 4740 (LR2 *Pspac-dnaA*  $\Omega$ *amyE::neo hbsU-gfp*). Phase  
975 contrast and the corresponding GFP images, which were overlaid, were acquired  
976 automatically every 5 min.

977

978 **Movie 2:** Some un-constrained L-form cells growing in the gutters of microfluidic systems  
979 remain in good focus. Related to Figure 1B. Time-lapse series with an agarose-based  
980 microfluidic system showing the growth of L-forms of strain 4745 (RM121  $\Omega$ *amyE::hbsU-*  
981 *mCherry rpoC-gfp*) in the gutter, from which the panels in Figure 1B were obtained. Phase  
982 contrast (left panel) and the corresponding HU-GFP (middle panel) images were acquired  
983 automatically every 5 min. Overlay of the phase contrast and the corresponding HU-GFP  
984 images is shown on the right.

985

986 **Movie 3:** L-form division and chromosome distribution in wide microfluidic channels (I).  
987 Related to Figure 3B. A time-lapse series showing cell division events and escaping of  
988 daughter cells of L-forms growing in wide channels. Chromosomes are not well separated  
989 and are distributed irregularly. The cell shown was in a 2.0  $\mu\text{m}$  wide channel (Chip No. 7).  
990 Bright field images are shown on the left and the corresponding HU-GFP images showing the  
991 nucleoids are on the right. Strain: 4739 (LR2  $\Omega$ *amyE::neo hbsU-gfp*). 5 min between frames.

992

993 **Movie 4:** Another example of regular chromosome segregation in microfluidic channels.  
994 Time-lapse Series showing L-form cells of strain 4739 (LR2  $\Omega$ *amyE::neo hbsU-gfp*) growing in  
995 microfluidic channels (Chip No. 2; channel widths 0.8, 0.9 and 1.0  $\mu\text{m}$ ) at 32°C.  
996 Chromosomes can be seen segregating relatively regularly as the cells grew. Images were  
997 captured every 5 min. Bright field images are shown on the left and the corresponding HU-  
998 GFP images showing the nucleoids are on the right. Related to Figure 3A and Figure S2.

999 **Movie 5:** L-form division and chromosome distribution in wide microfluidic channels (II).

1000 Related to Figure S3B. A time-lapse series of merged HU-GFP (green) and bright field (grey  
1001 scale) images showing irregularly distributed chromosomes in L-forms growing in wide  
1002 channels becoming separated and more regularly distributed in the narrow parts of the cell  
1003 where membrane constrictions persisted. The cell shown was in a 1.4  $\mu\text{m}$  wide channel  
1004 (Chip No. 6). Strain: 4739 (LR2  $\Omega$ *amyE::neo hbsU-gfp*). 5 min between frames.

1005

1006 **Movie 6:** L-form division and chromosome distribution in mixed shaped microfluidic device.  
1007 Related to Figure 3E & S3C. A time-lapse series of HU-GFP (bottom) and bright field (top)  
1008 images showing chromosome distribution in Chip No.33, which contained alternating  
1009 narrow channels and diamond shapes. Dis-organised chromosomes in the diamond parts  
1010 became regularly distributed in the straight and narrow channels. Strain: 4741 (LR2  
1011 *ΩamyE::neo hbsU-gfp aprE::P<sub>rpsD</sub>-mcherry spc*). 5 min per frame.

1012  
1013 **Movie 7:** Bisection of chromosomes in L-forms growing in wide channels. Related to Figure  
1014 4. Chromosomes (green, overlaid with the bright field images shown in grey scale) can be  
1015 seen passing through areas of invagination, probably prevented division. A small cell with  
1016 little amount of DNA (Frames 27 onwards) appeared not growing, probably because its  
1017 chromosome is incomplete. The cell shown was in a 1.8 μm wide channel (Chip No. 7). 5 min  
1018 between frames. Strain: 4739 (LR2 *ΩamyE::neo hbsU-gfp*).

1019 **Movie 8** Another example of chromosome bisection in L-forms growing in wide channels.  
1020 Related to Figure S4. A chromosome (green, overlaid with the bright field images shown in  
1021 grey scale) appeared to have been bisected by division, generating two small lobes of DNA  
1022 (Frame 19) that retained at the extreme ends of the cell where division had occurred. The  
1023 cell shown was in a 1.8 μm wide channel (Chip No. 7). Strain: 4739 (LR2 *ΩamyE::neo hbsU-*  
1024 *gfp*).

1025 **Movie 9:** DNA-less 'beads' produced by L-form in narrow channels under normal growth  
1026 conditions. Related to Figure 5A. The time-lapse series shows cells in the gutter grew into  
1027 the narrow channels with the mass of the nucleoid excluded from entry, generating strings  
1028 of DNA-less beads in narrow channels. Each frame shows chromosomes in green overlaid  
1029 with the corresponding bright field image. Strain: 4739 (LR2 *ΩamyE::neo hbsU-gfp*). 5 min  
1030 between frames.

1031 **Movie 10:** Small DNA-free cells generated by divisions in DNA-free region of cells in wide  
1032 channels. Related to Figure 5C. A cell, appeared to be defective in chromosome replication  
1033 (for unknown reason), produced many small DNA-free daughter cells of various sizes. The  
1034 cell shown was in a 2.2 μm wide channel (Chip No. 7). Each frame shows bright field images  
1035 on the left and chromosomal DNA labelled with HU-mCherry on the right. 5 min between  
1036 frames. Strain: 4739 (LR2 *ΩamyE::neo hbsU-gfp*).

1037 **Movie 11:** DNA-less cells produced in narrow channels by L-forms inhibited for DNA  
1038 replication. The time-lapse series shows formation of DNA-less 'beads on a string'. The  
1039 replication inhibitor HB-EmAu was present in the medium throughout the time-lapse  
1040 experiment. Strain: 4739 (LR2 *ΩamyE::neo hbsU-gfp*). 3 min between frames. Related to  
1041 Figure 5D.

1042 **Movie 12:** Large DNA-free cells divided into smaller cells. Related to Figure 5E. The time-  
1043 lapse series shows formation of large DNA-less cells in narrow channels by L-forms inhibited  
1044 for DNA replication, which divided further into smaller DNA-less daughters. The replication  
1045 inhibitor HB-EmAu was present in the medium throughout the time lapse experiment.  
1046 Strain: 4739 (LR2 *ΩamyE::neo hbsU-gfp*). 3 min between frames.

1047 **Movie 13:** Re-centring of the single nucleoid after division. Time lapse of the experiment  
1048 shown in Figure 6. The bright field image and the green fluorescence image of the  
1049 chromosomal DNA labelled with HU-GFP (GFP in green) are merged. After division the  
1050 asymmetrically located nucleoid moved towards the distal pole to re-centre itself. L-forms  
1051 of strain 4739 (LR2  $\Omega$ *amyE::neo hbsU-gfp*) were grown in the presence of the DNA  
1052 replication inhibitor HB-EmAu in liquid culture and after introduction into a microfluidic  
1053 device. 3 min per frame.

1054

Table S1. Bacterial strains and plasmid used in this study

| Strain                 | Relevant genotype <sup>a</sup>                                                                                     | Construction, Source, or Reference <sup>b</sup> |
|------------------------|--------------------------------------------------------------------------------------------------------------------|-------------------------------------------------|
| 168CA                  | <i>trpC2</i>                                                                                                       | Lab stock                                       |
| LR2                    | 168ca $\Omega$ spoVD:: <i>cat P<sub>xyI</sub>-murE <math>\Omega</math>amyE::xyIR tet xseB*</i> (Frameshift 22T)    | (Mercier et al., 2013)                          |
| RM121                  | 168CA $\Delta$ 18:: <i>tet pLOSS-P<sub>spac</sub>-murC erm</i>                                                     | (Mercier et al., 2013)                          |
| PL10                   | <i>trpC2 dnaA::pMUTIN4 (dnaA'-lacZ ermC P<sub>spac</sub>-dnaA)</i>                                                 | Prolysis Ltd.                                   |
| SL004                  | <i>trpC2 <math>\Omega</math>amyE::(cat hbsU-gfp)</i>                                                               | JW Veening & J Errington (unpublished)          |
| Bs138                  | <i>trpC2 <math>\Omega</math>amyE::(cat xyIR neo hbsU-gfp)</i>                                                      | (Leaver and Errington, 2005)                    |
| 1048                   | <i>rpoC-gfp cat P<sub>1048</sub>-rpoC trpC2</i>                                                                    | (Lewis et al., 2000)                            |
| 2010                   | <i>trpC2 xyIR::tet</i>                                                                                             | Lab stock                                       |
| 4738                   | LR2 <i>aprE::P<sub>rpsD</sub>-mcherry spc</i>                                                                      | (Kawai et al., 2014)                            |
| 4739                   | LR2 <i><math>\Omega</math>amyE::neo hbsU-gfp</i>                                                                   | BS138 → LR2 (kan)                               |
| 4740                   | LR2 <i><math>\Omega</math>amyE::neo hbsU-gfp dnaA::pMUTIN4 (dnaA'-lacZ ermC P<sub>spac</sub>-dnaA)</i>             | PL10 → 4739 (erm/lin)                           |
| 4741                   | LR2 <i><math>\Omega</math>amyE::neo hbsU-gfp aprE::P<sub>rpsD</sub>-mcherry spc</i>                                | 4738 → 4739 (spc)                               |
| 4742                   | LR2 <i><math>\Omega</math>amyE::neo hbsU-gfp aprE::P<sub>rpsD</sub>-mcherry spc xyIR::tet</i>                      | 2010 → 4741 (tet)                               |
| 168ca hbsU-mCherry cat | 168ca <i><math>\Omega</math>amyE::cat hbsU-mCherry</i>                                                             | JW Veening & J Errington (unpublished)          |
| 4743                   | 168ca <i><math>\Omega</math>amyE::(<math>\Omega</math>cat::neo) hbsU-mCherry</i>                                   | pCm::Nm → 168ca hbsU-mCherry cat (neo; cat)     |
| 4744                   | RM121 <i><math>\Omega</math>amyE::(<math>\Omega</math>cat::neo) hbsU-mCherry</i>                                   | 4743 → RM121 (neo)                              |
| 4745                   | RM121 <i><math>\Omega</math>amyE::(<math>\Omega</math>cat::neo) hbsU-mCherry rpoC-gfp cat P<sub>xyI</sub>-rpoC</i> | 1048 → 4744 (cat)                               |

a:  $\Omega$ , insertion at the indicated locus. The gene or genes inserted are indicated after the double colon. *cat*, chloramphenicol acetyl transferase gene, conferring resistance to chloramphenicol. *neo*, conferring resistance to kanamycin. *phl*, conferring resistance to phleomycin. *spc*, conferring resistance to spectinomycin. *P<sub>xyI</sub>* fusion to a xylose-inducible promoter. *P<sub>spac</sub>* fusion to an IPTG-inducible promoter.

b: for strains constructed in this work by transformation, the plasmid or the donor strain of the chromosomal DNA is in front of the arrow and the recipient strain is behind the arrow. The antibiotic selection for the transformation is indicated in brackets following the recipient strain.

# Figure 1 (Wu et al.)

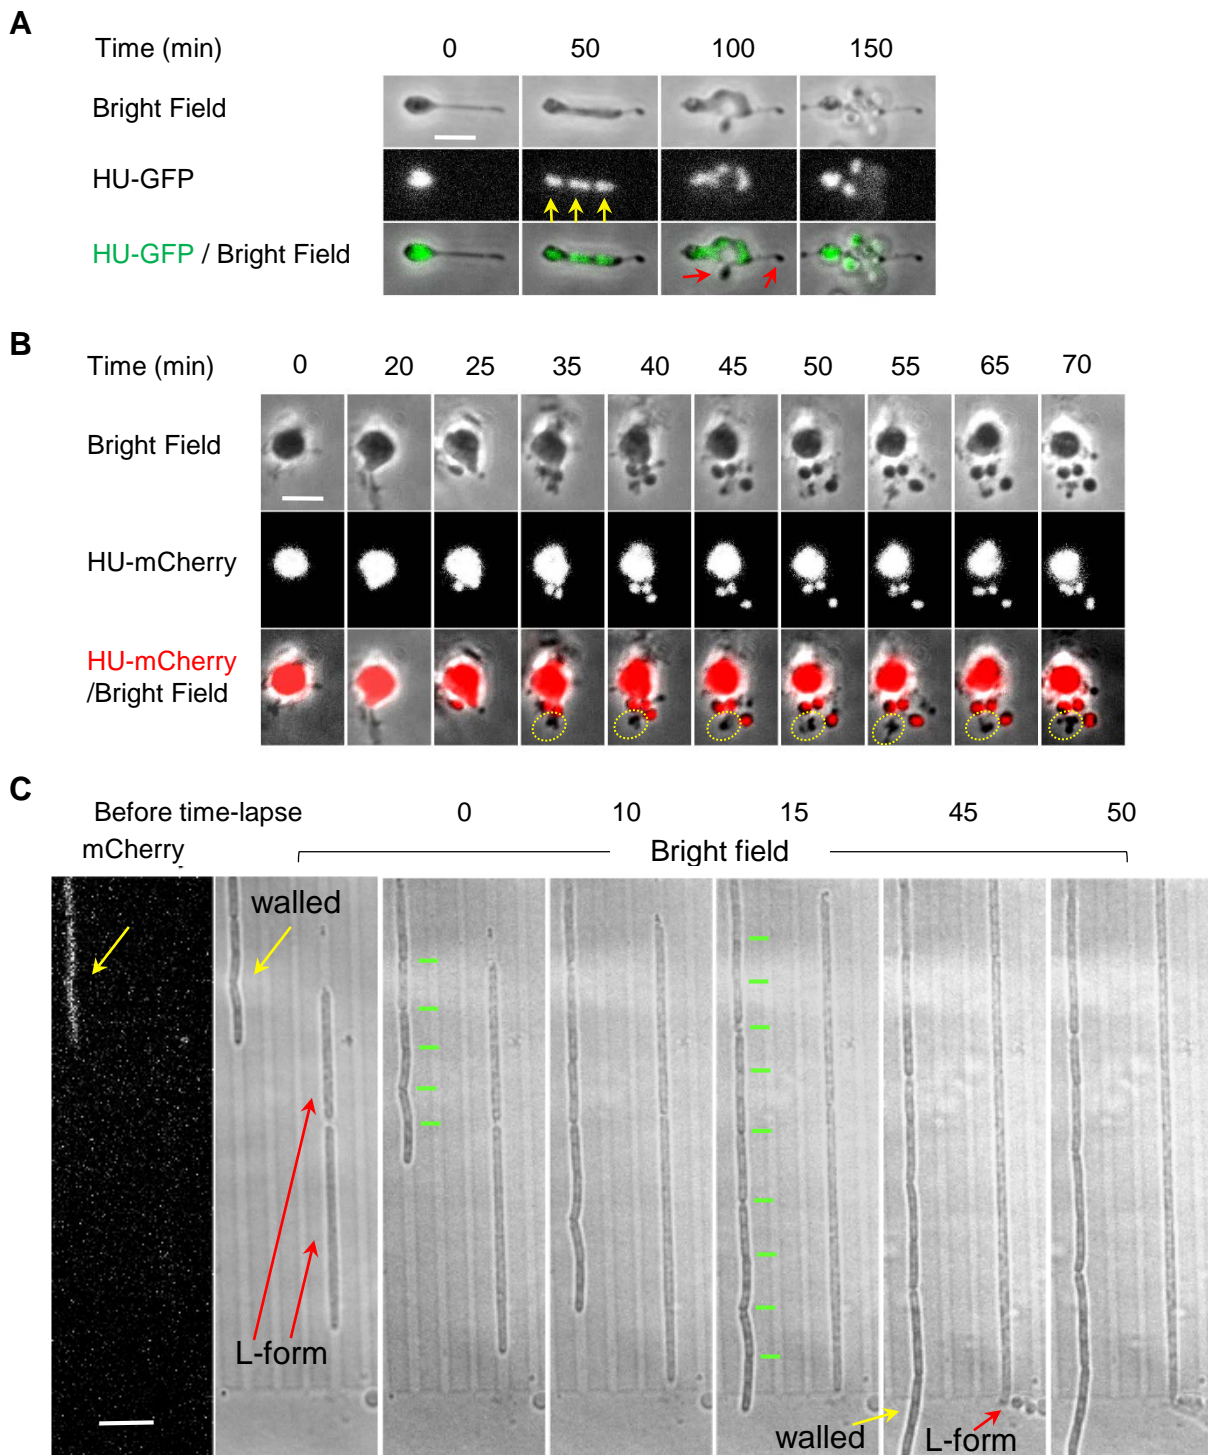

# Figure 2 (Wu et al.)

## A (narrow channels - 0.8 & 0.9 $\mu\text{m}$ )

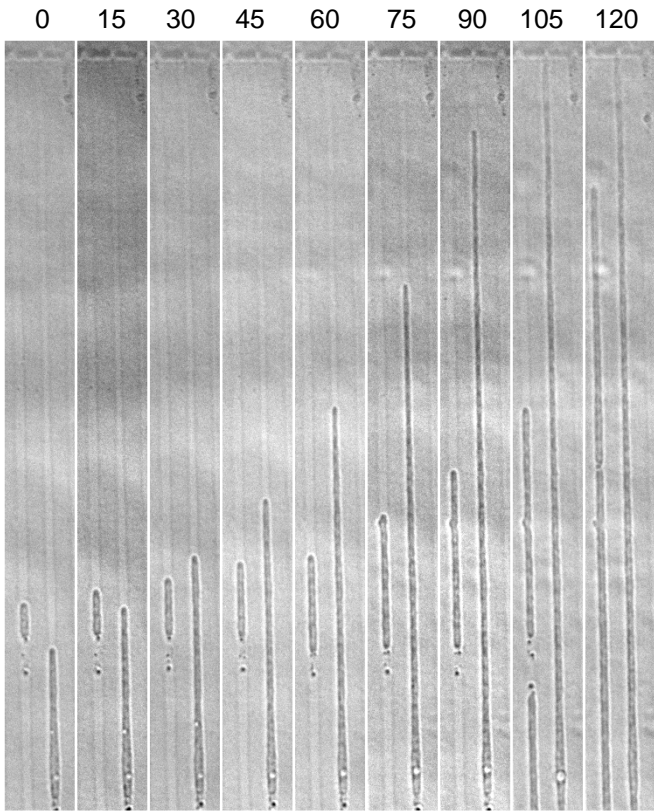

## B (wide channels – 2.2 $\mu\text{m}$ )

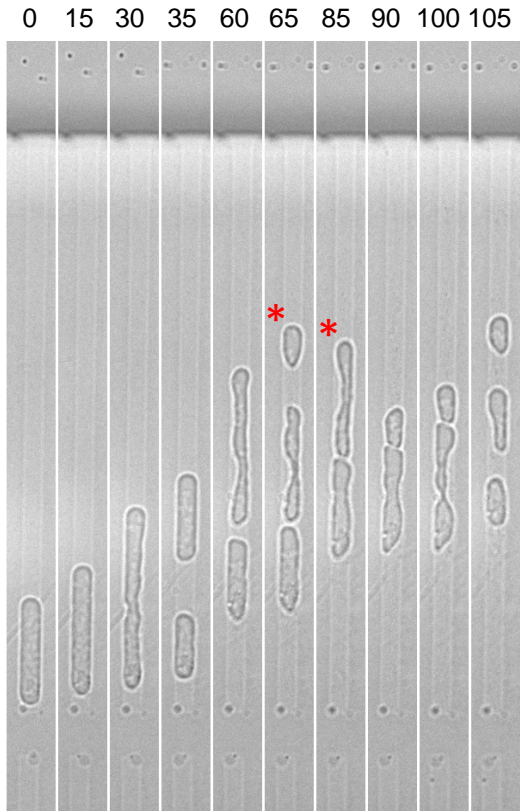

## C

|                        | Narrow channels (< 1 $\mu\text{m}$ ) | Wide channels (1 - 2.2 $\mu\text{m}$ ) |
|------------------------|--------------------------------------|----------------------------------------|
| No. of division events | 7                                    | 72                                     |
| No. of cells           | 37                                   | 38                                     |
| Division frequency     | 0.2 / cell                           | 1.9 / cell                             |

Figure 3 (Wu et al.)

**A** (narrow channels - 0.8 & 0.9  $\mu\text{m}$ )

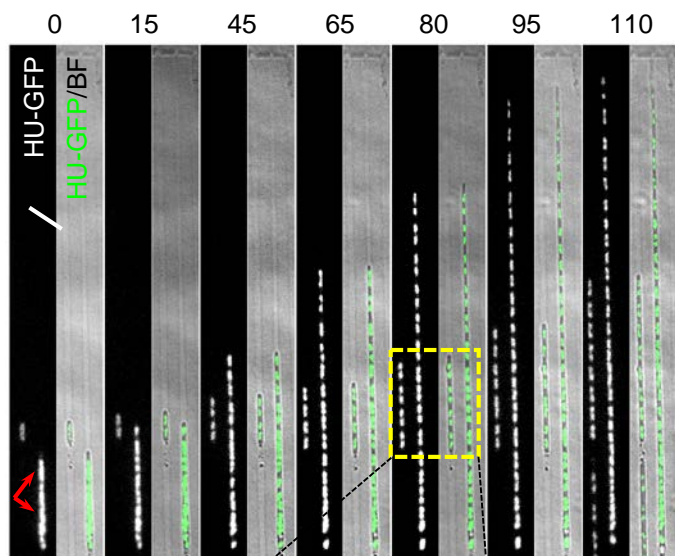

**B** (wide channel - 2.0  $\mu\text{m}$ )

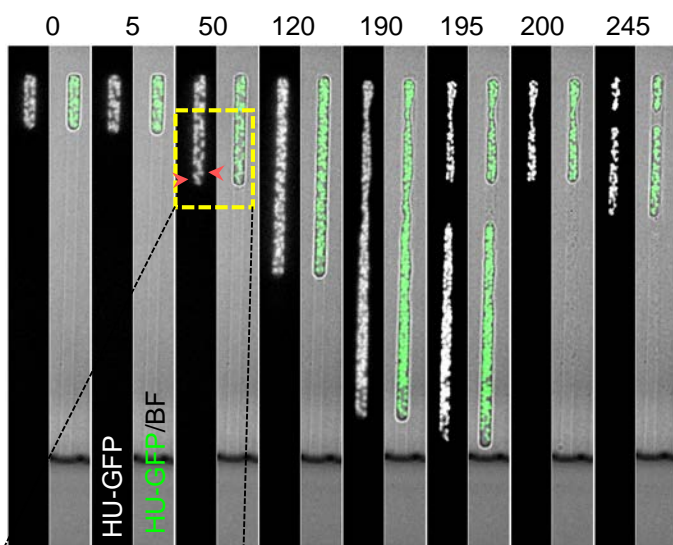

**C**

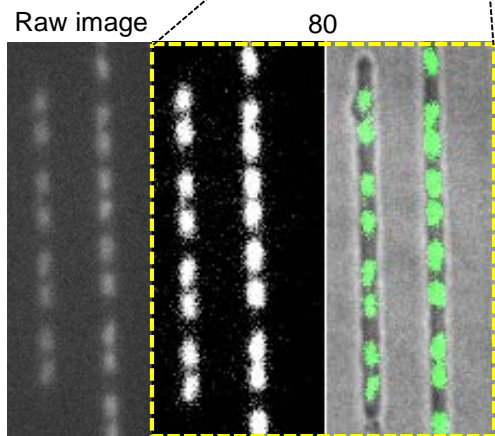

**D**

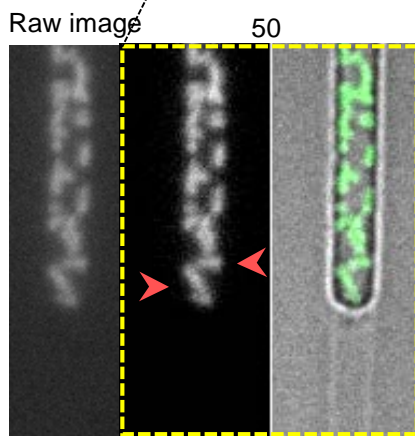

**E** (mixed shapes)

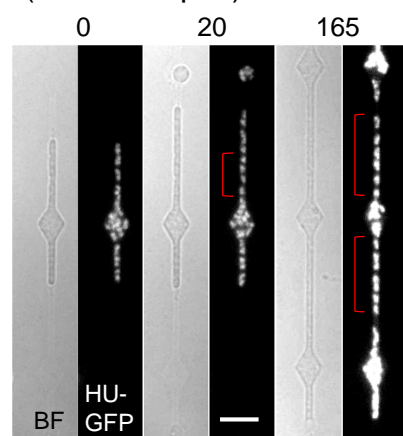

**F**

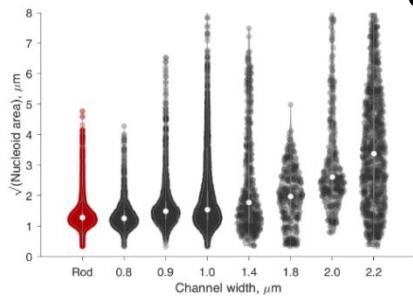

**G**

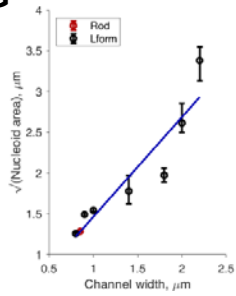

**H**

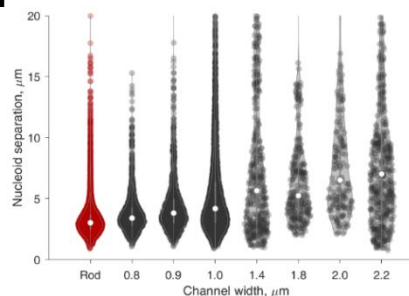

**I**

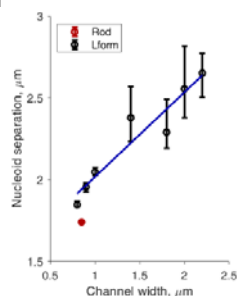

Figure 4 (Wu et al.)

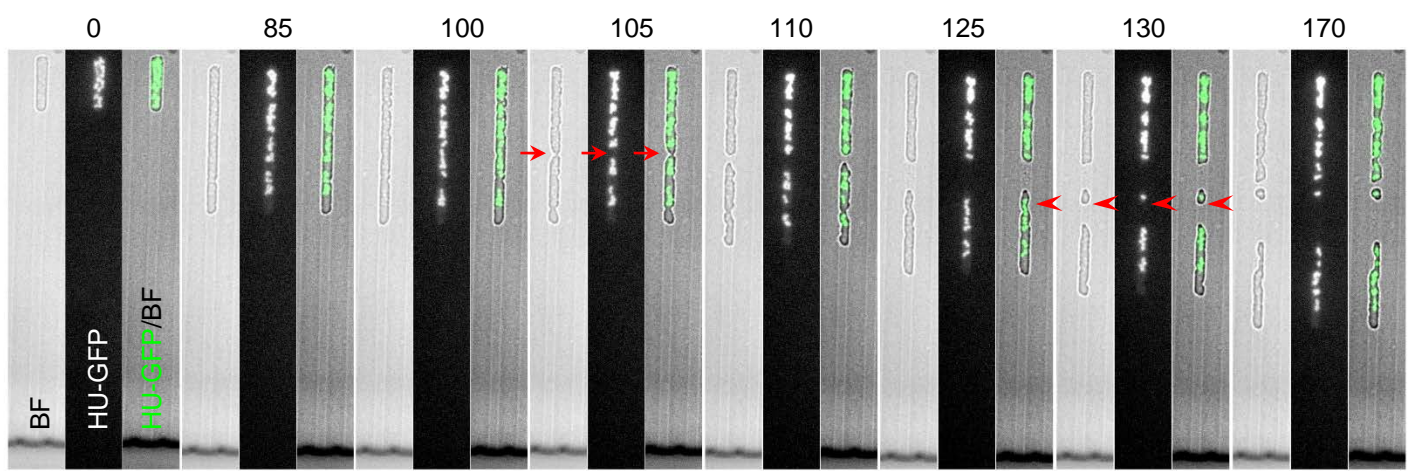



Figure 5 (Wu et al.)

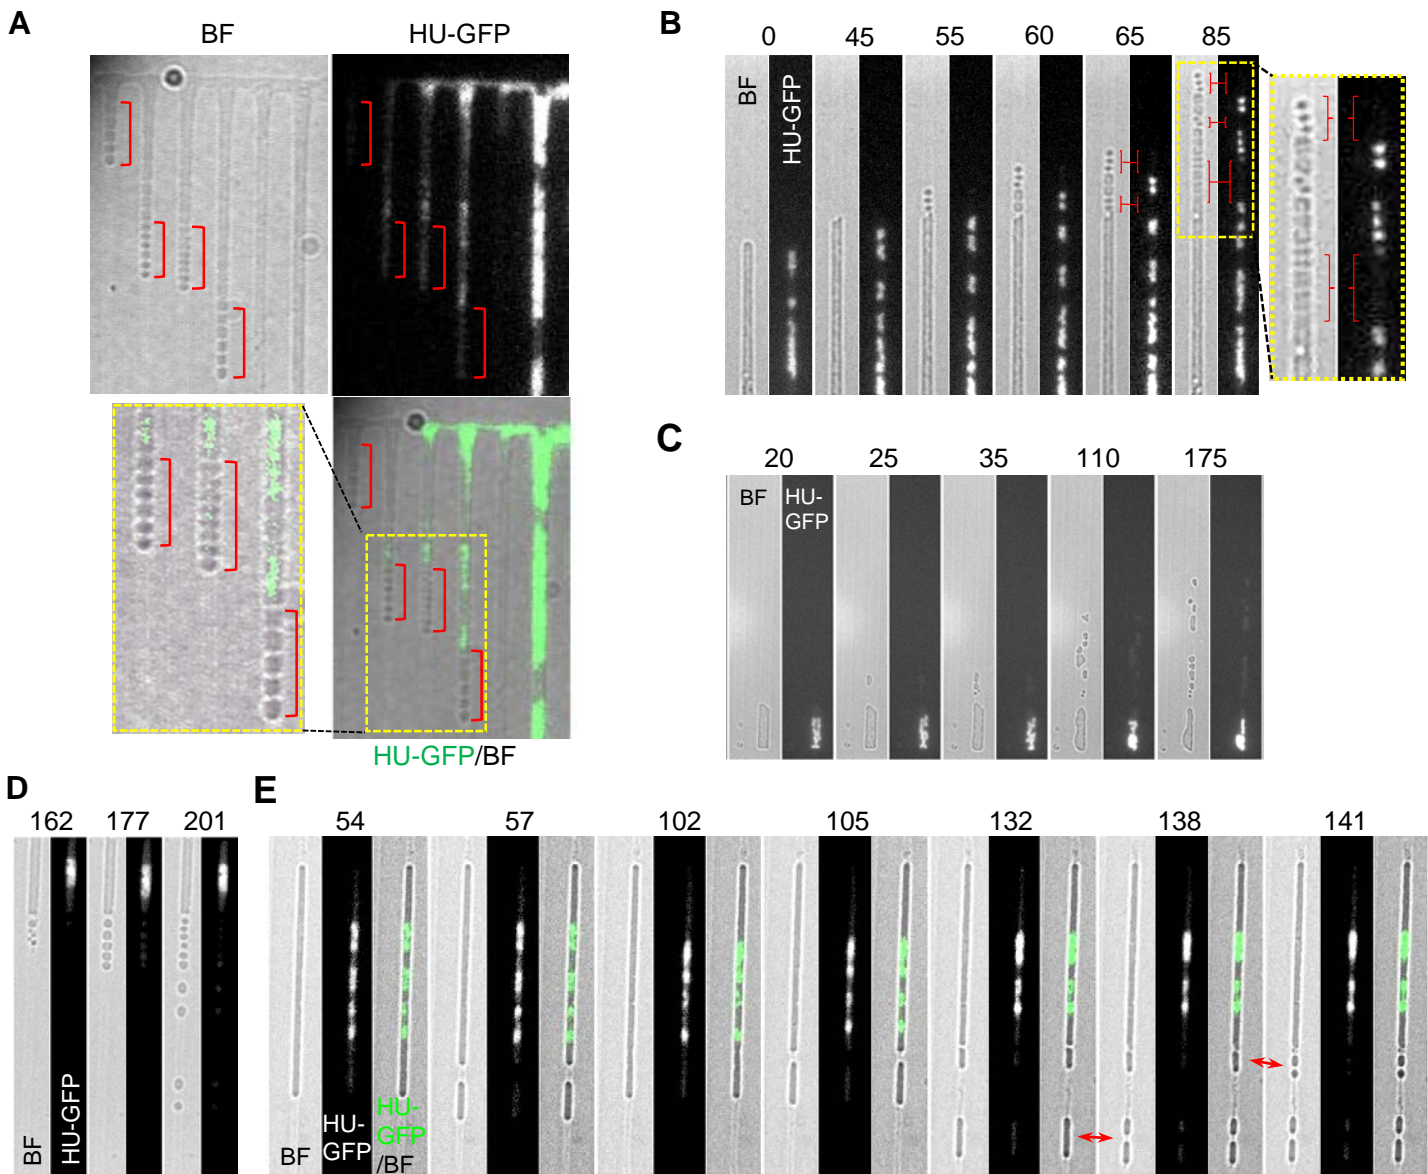

Figure 6 (Wu et al.)

A

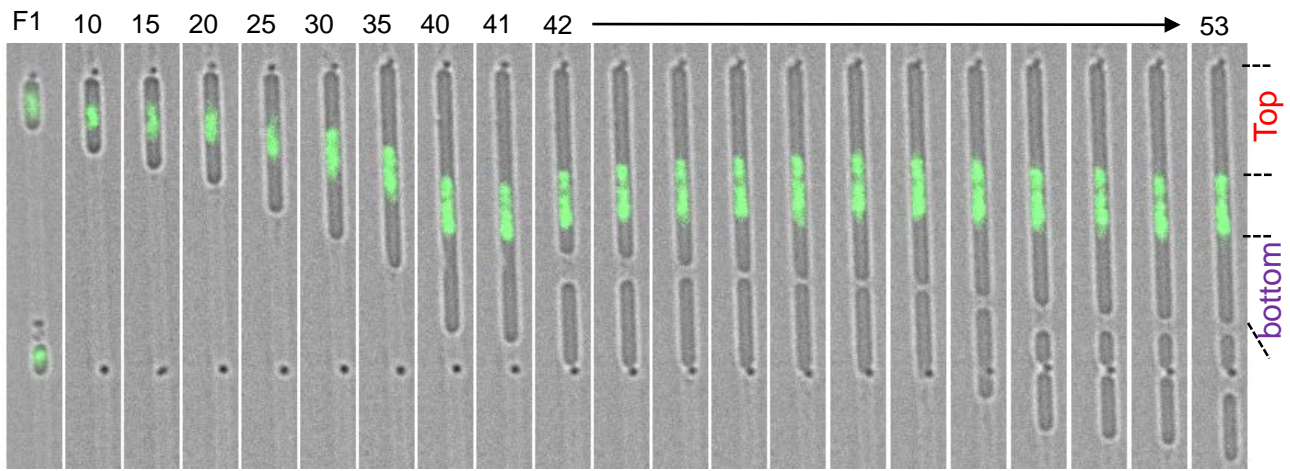

B

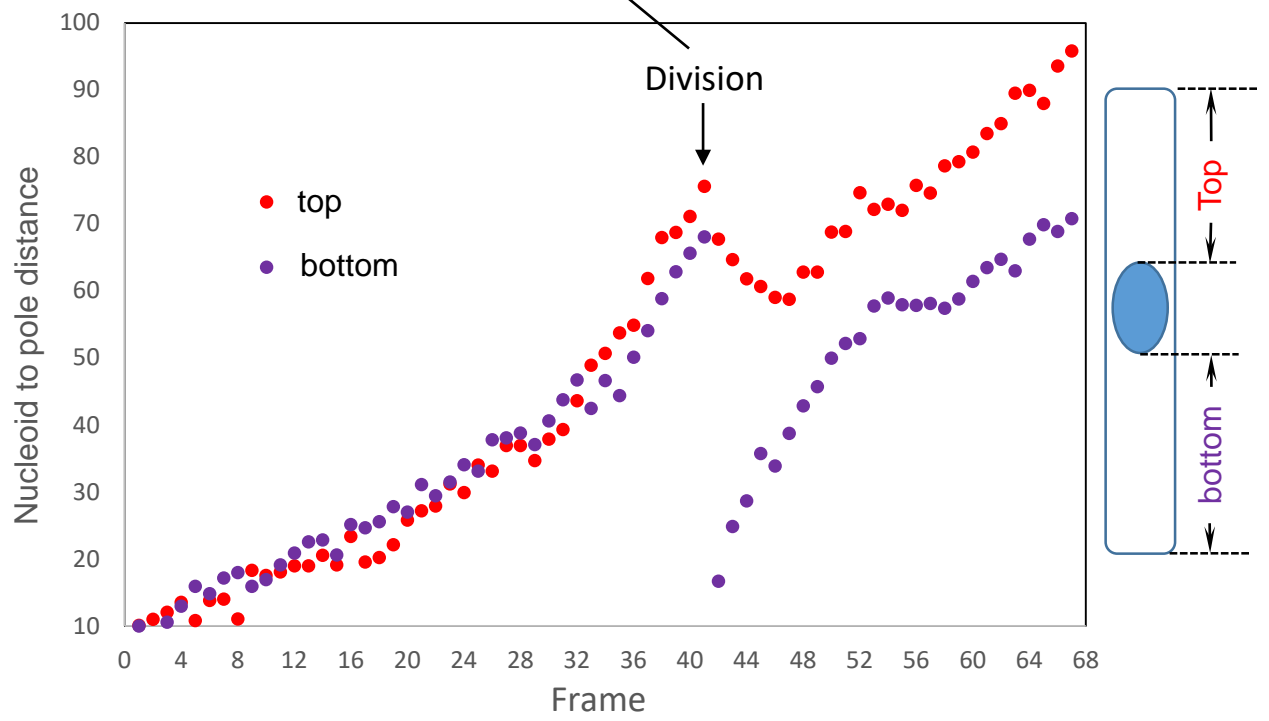

Figure S1 Microfluidic device base on that of Moffitt *et al* (2012)

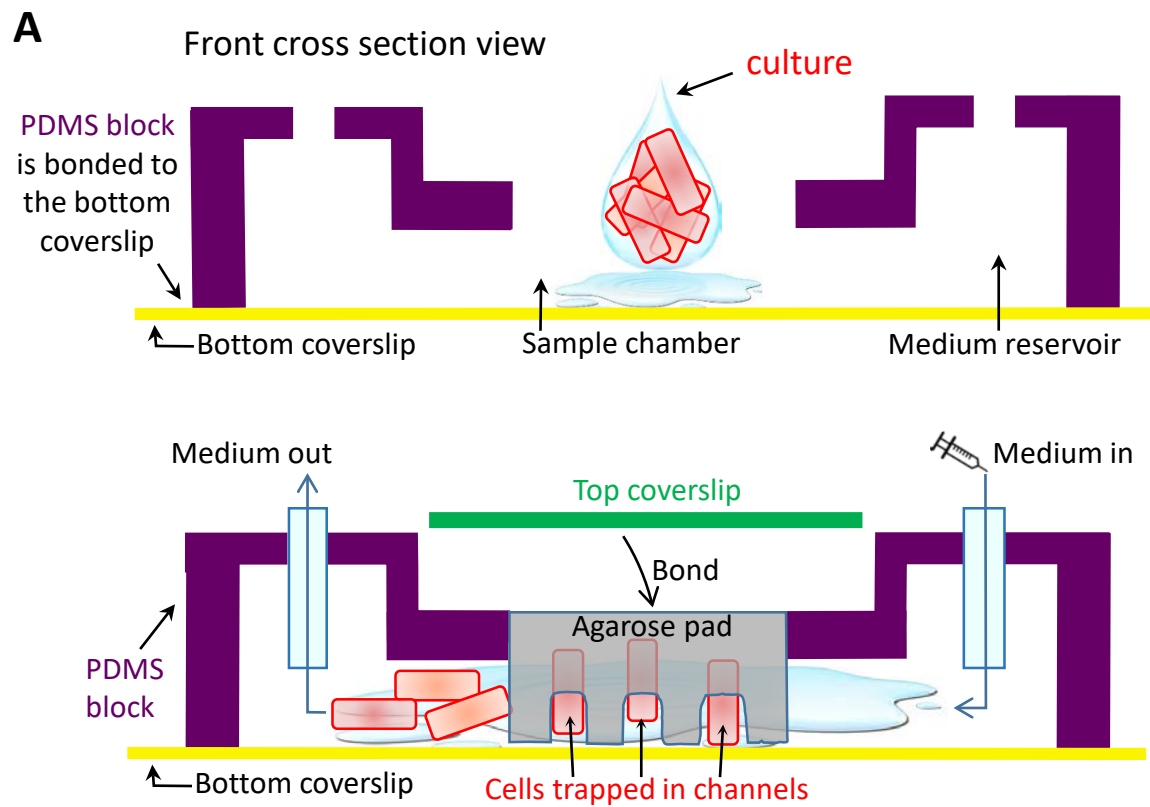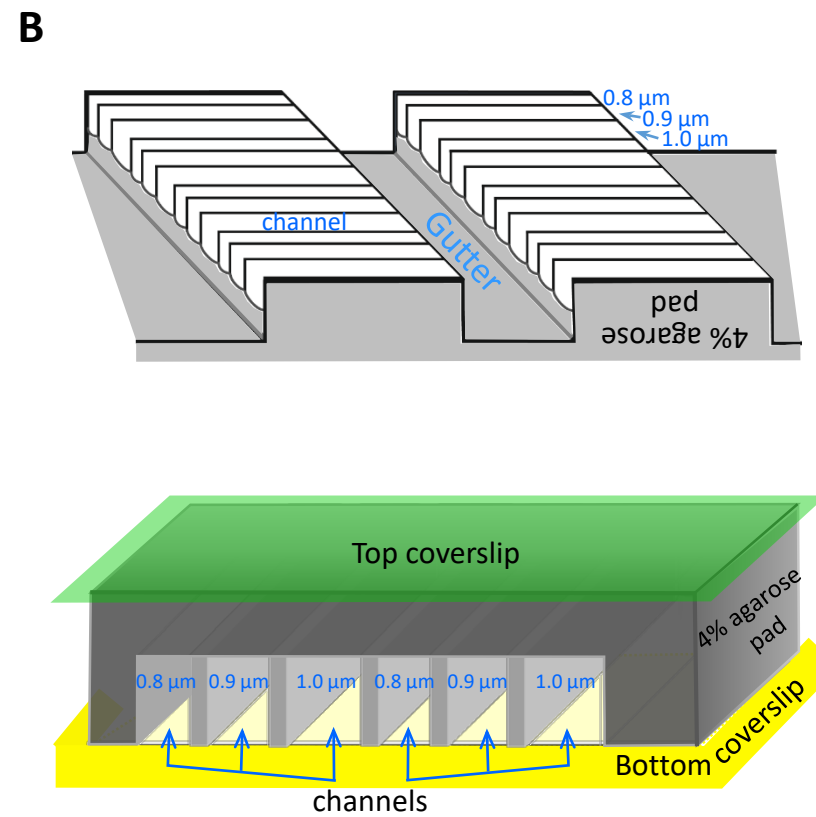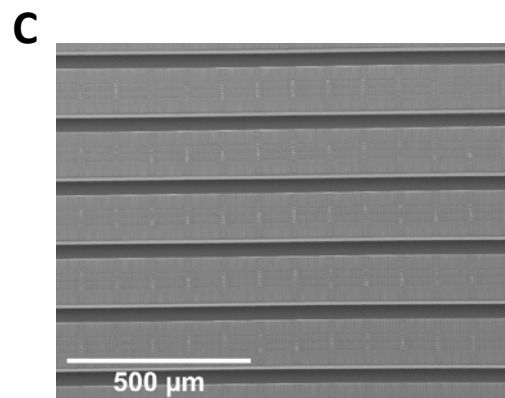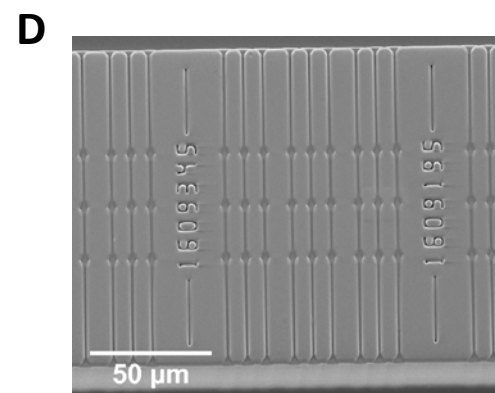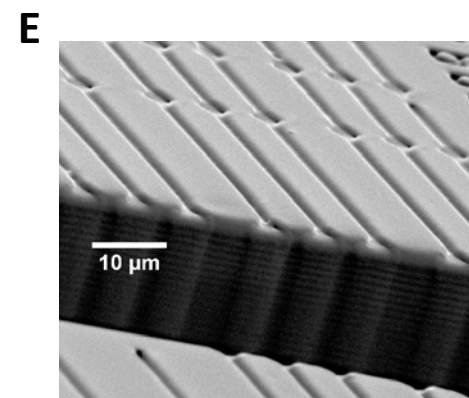

Figure S2 Regular chromosome segregation in microfluidic channels

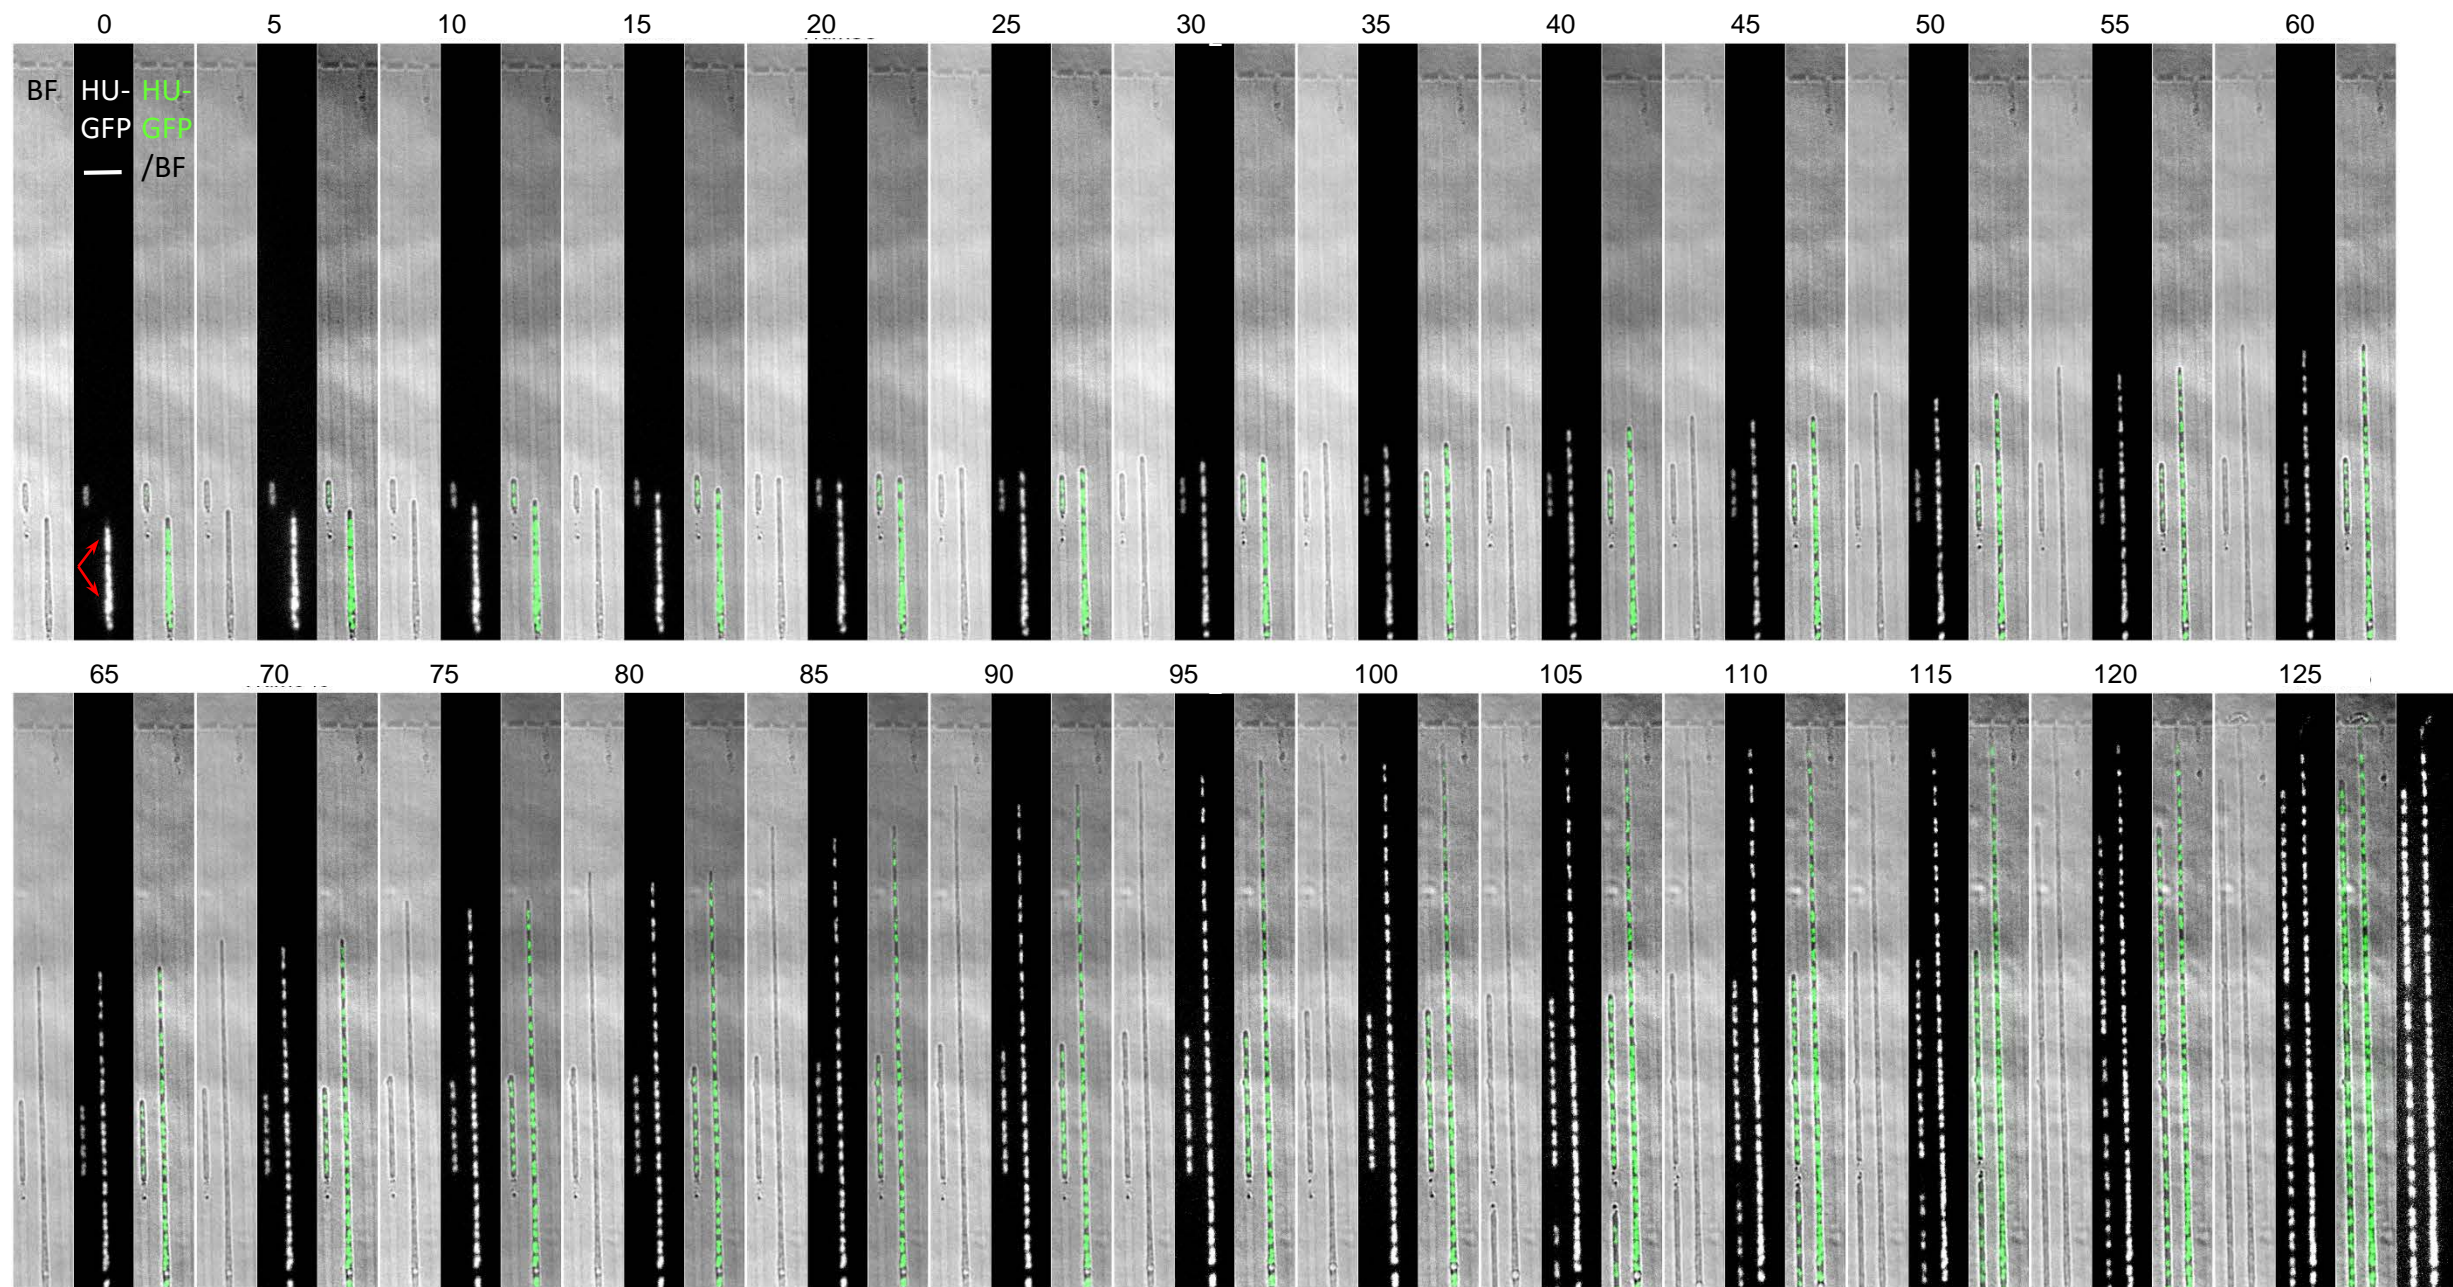

Figure S3

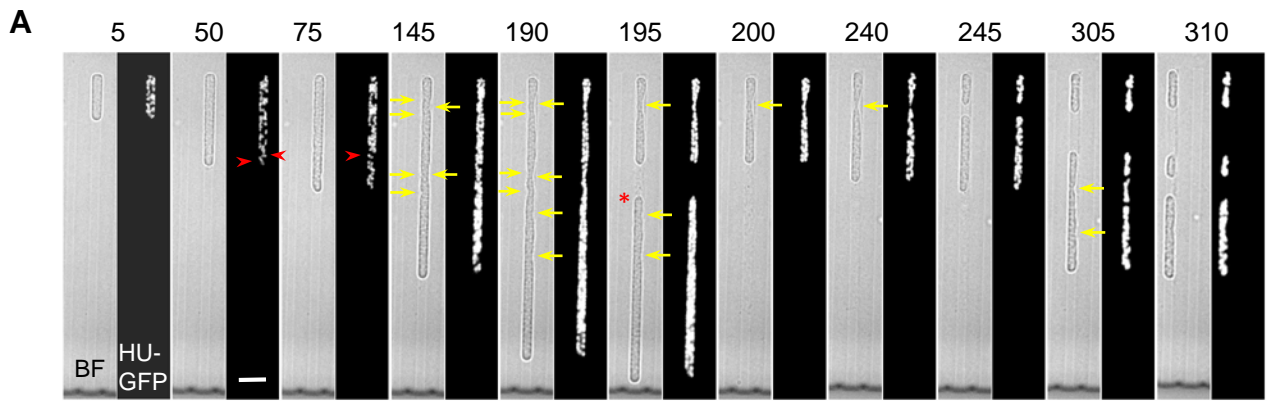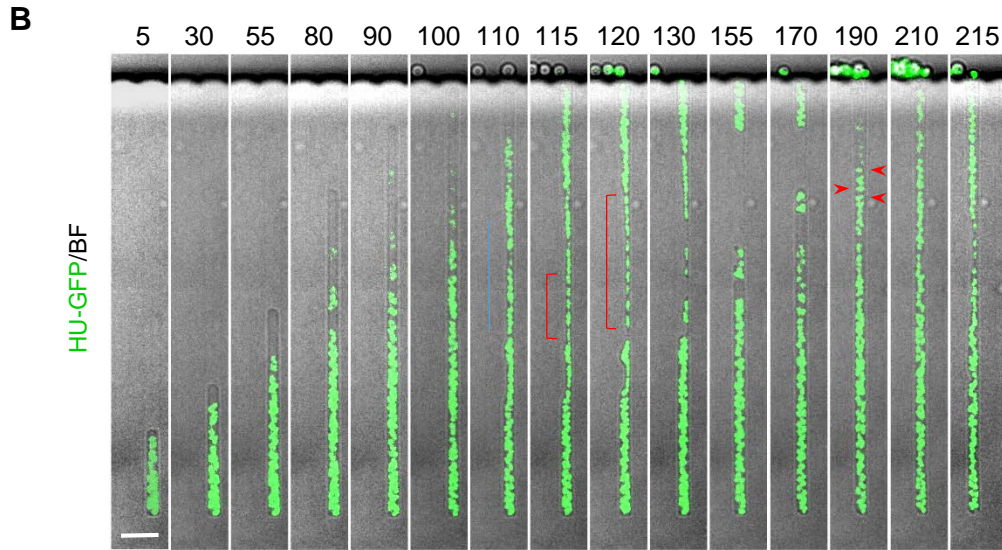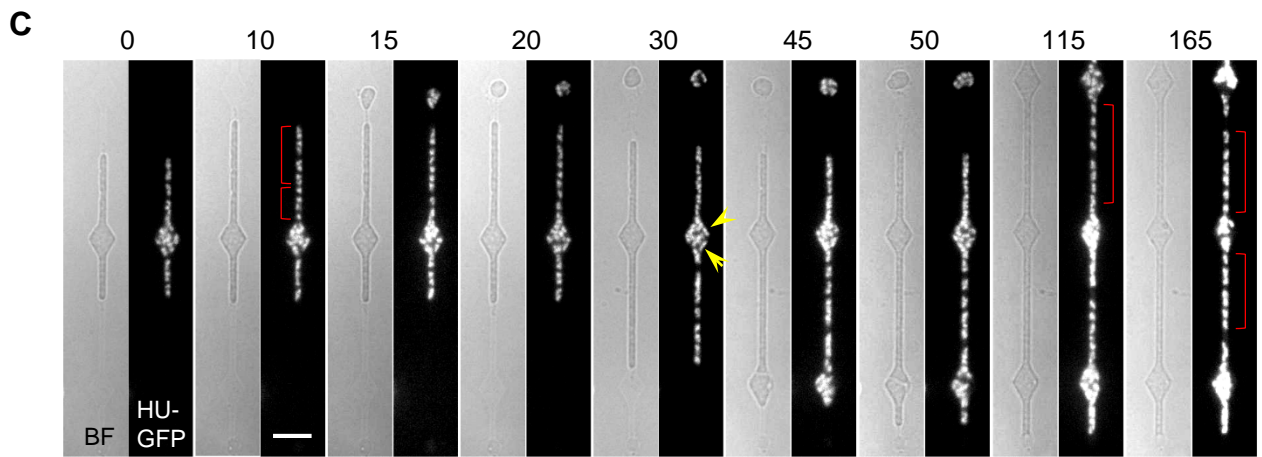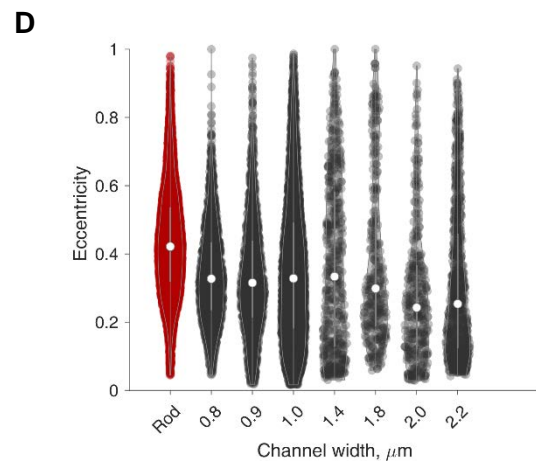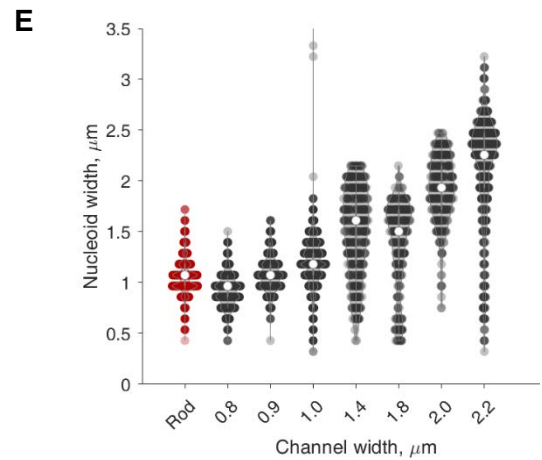

Figure S4 (Wu et al.)

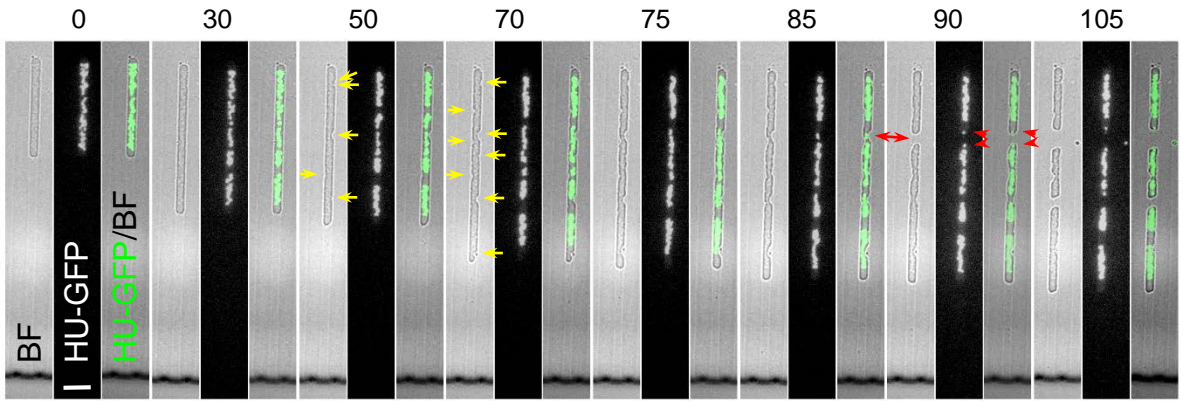

Figure S5

**A**

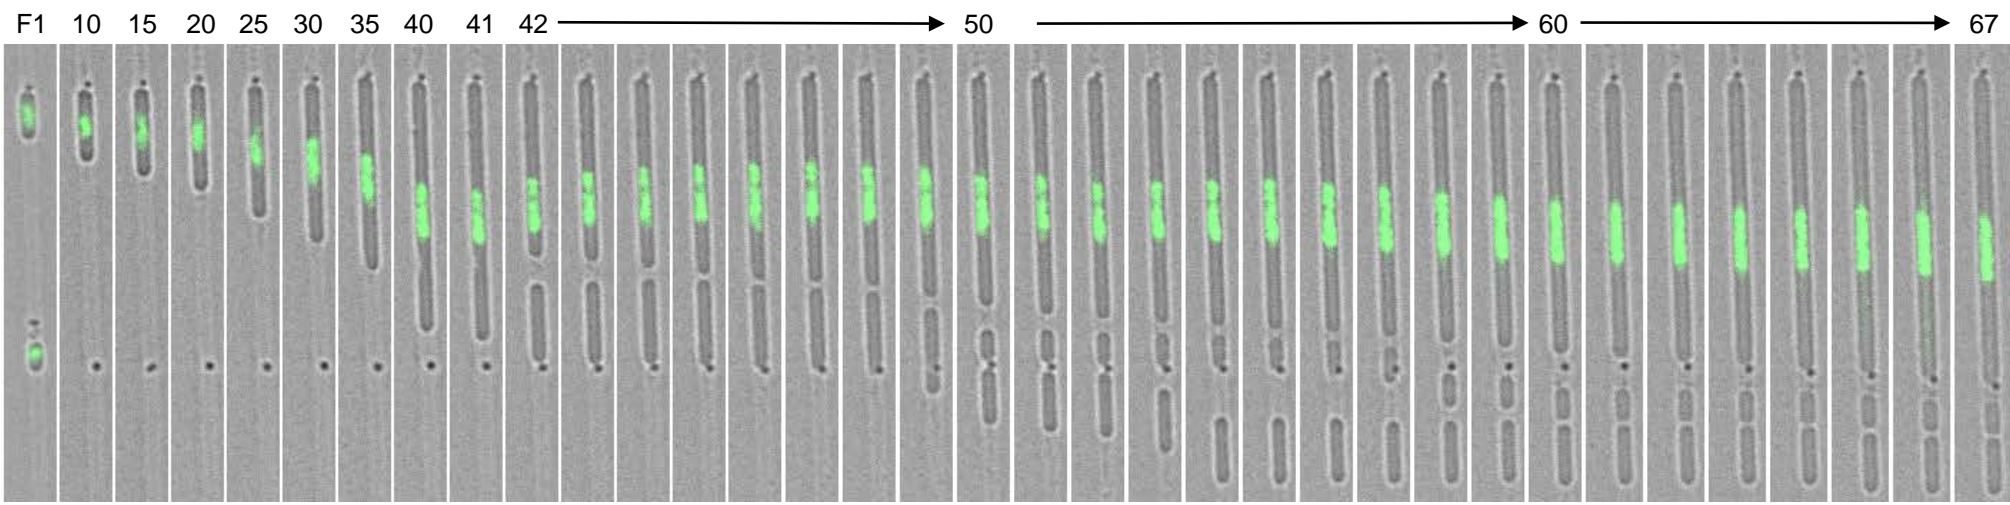

**C**

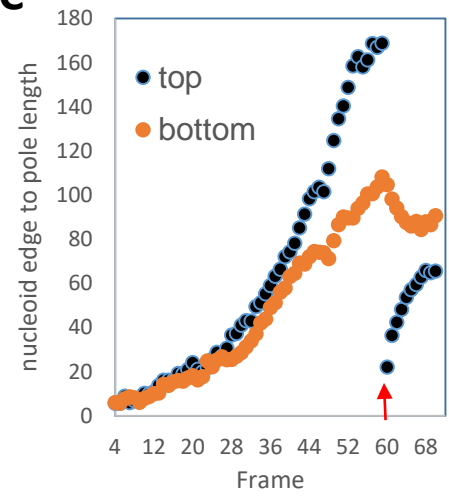

**B**

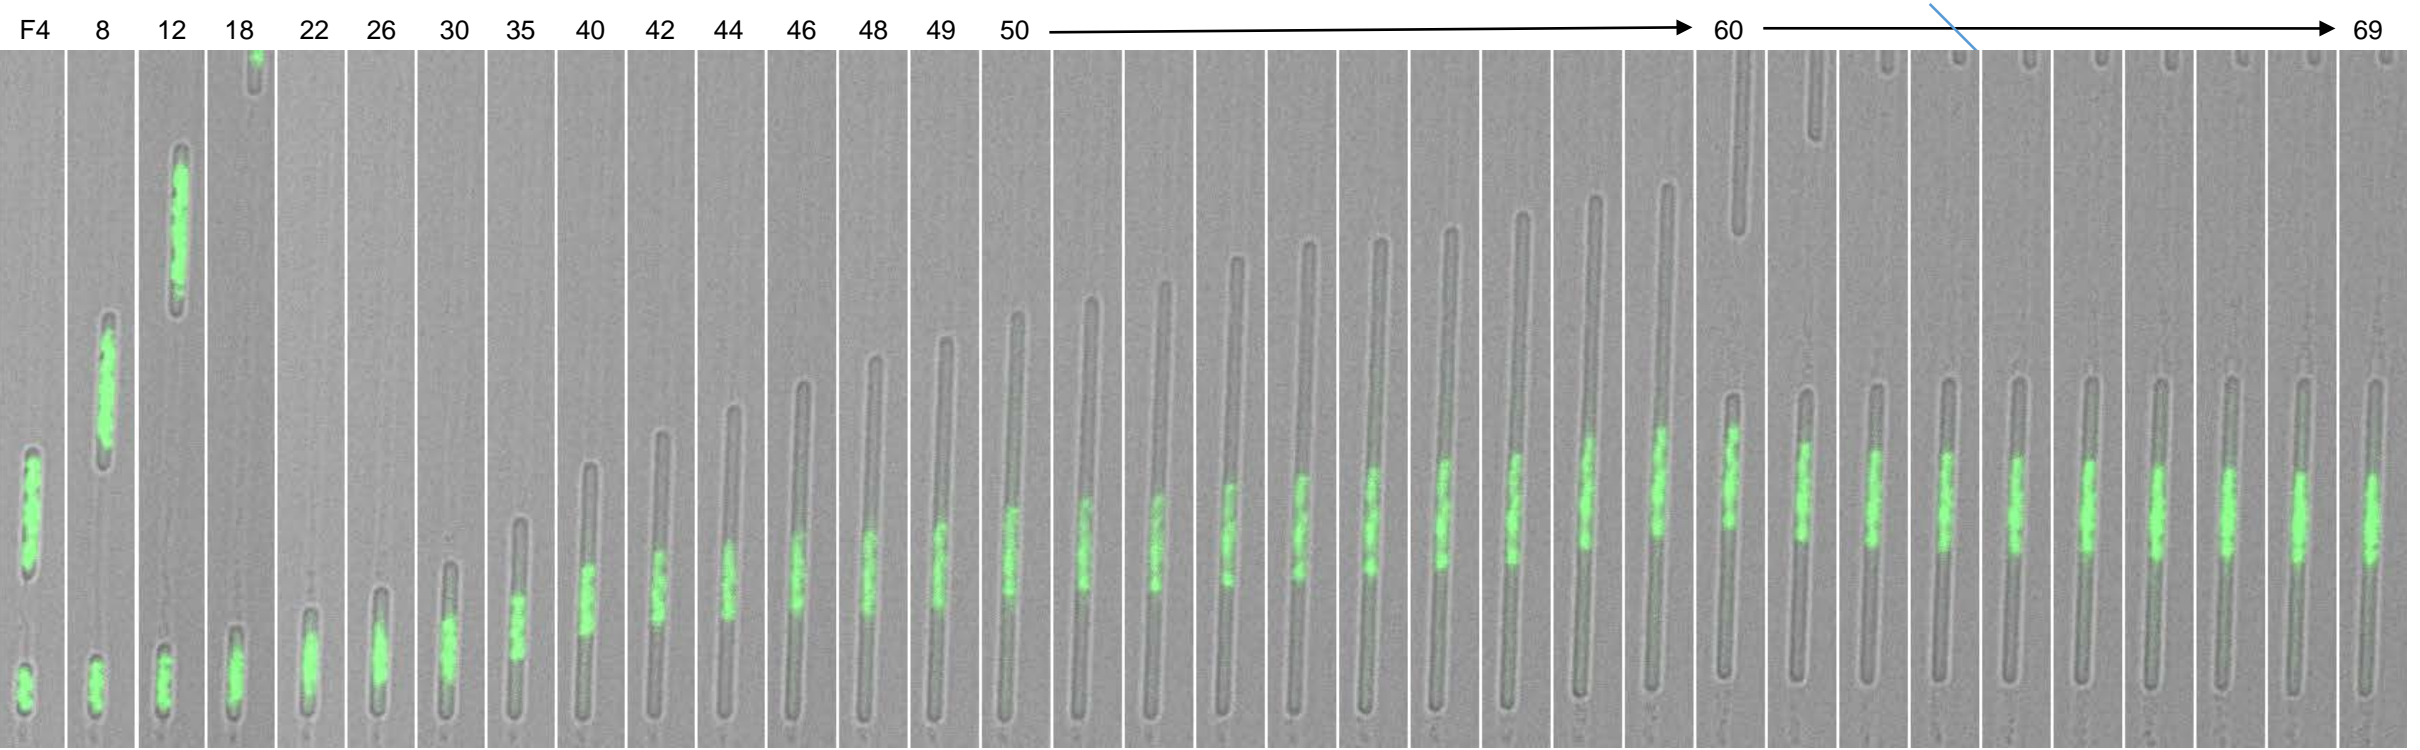

Figure S6 (Wu et al.)

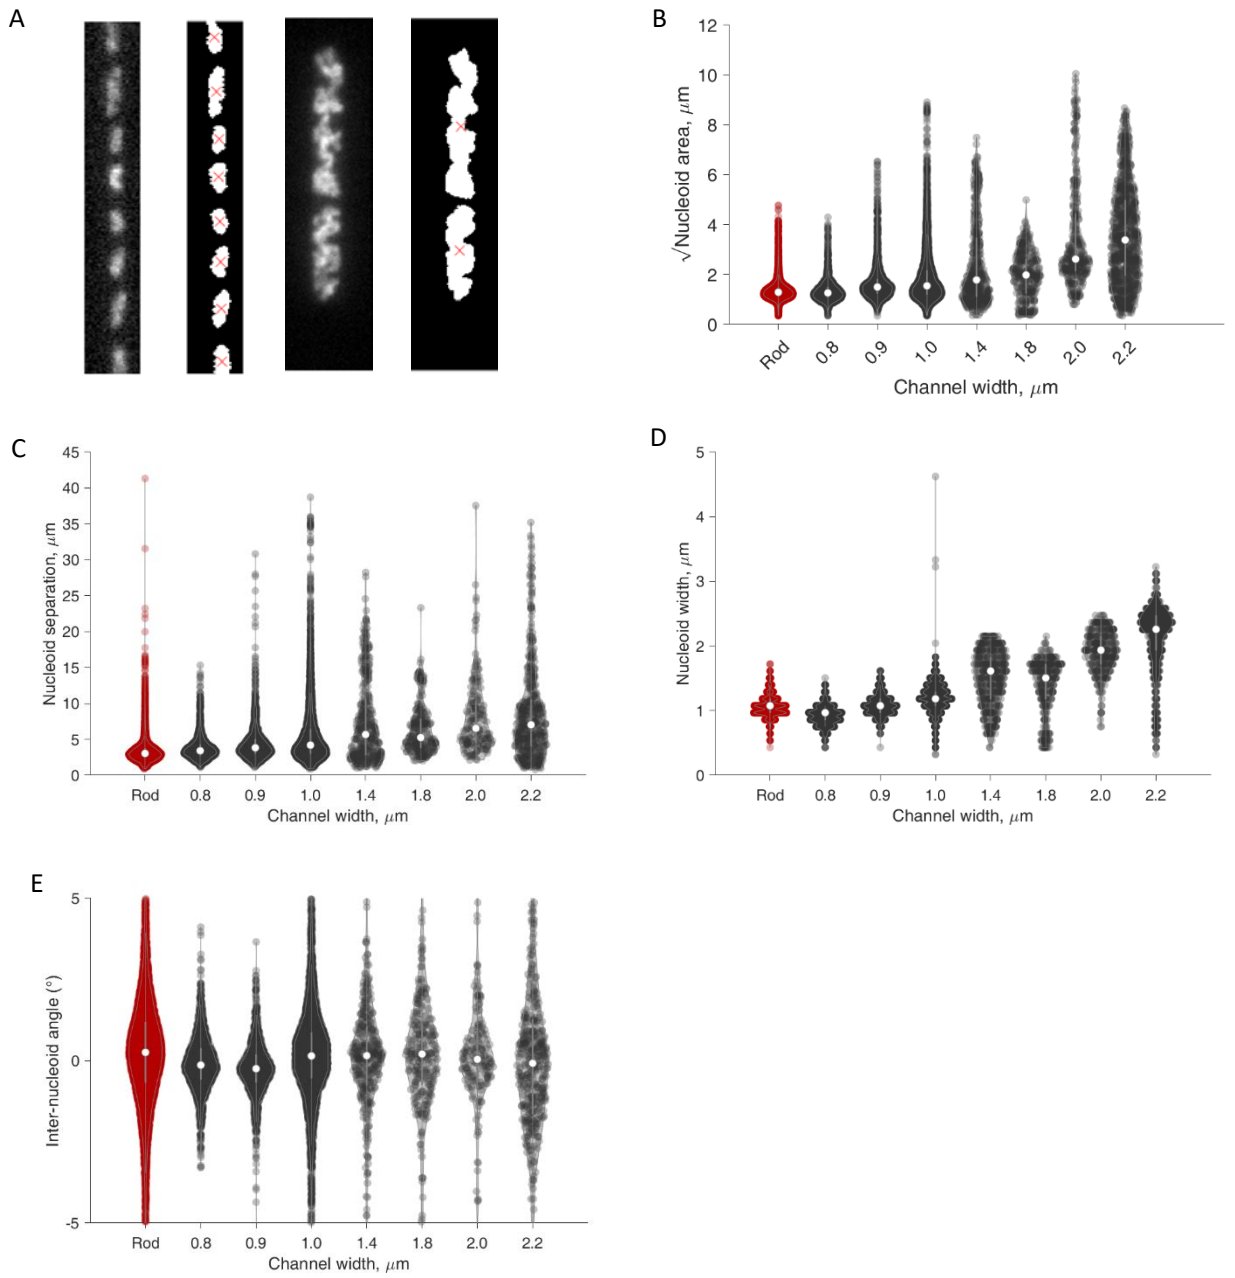

Source: https://www.biorxiv.org/content/10.1101/843979v1.full.pdf
